# Supplementary material for: Side-chain regulated topology of 2D covalent organic frameworks and its impact on photocatalytic synthesis of H 2 O 2
Source: Royal Society of Chemistry journal article supplement (doi:10.1039/d4tc03991b), 2024-12-02
Supplement: d4tc03991b1.pdf [file d4tc03991b1.pdf]

## *Supporting Information*

# Side-Chain Regulated Topology of 2D Covalent Organic Frameworks and Its Impact on Photocatalytic Synthesis of $\text{H}_2\text{O}_2$

Shuai Sun,<sup>a,b</sup> Chao-Qin Han<sup>\*,b</sup> Jia-Xin Guo,<sup>a,b</sup> Lei Wang,<sup>b</sup> Ze-Yang Wang,<sup>b</sup> Gonghao Lu<sup>\*,a</sup> and  
Xiao-Yuan Liu,<sup>\*,b</sup>

<sup>a</sup> School of Chemical Engineering, University of Science and Technology Liaoning, 185  
Qianshan Zhong Road, Anshan, 114051, P. R. China

<sup>b</sup> Hoffmann Institute of Advanced Materials, Shenzhen Polytechnic University, 7098 Liuxian  
Bldv, Nanshan District, Shenzhen, 518055, P. R. China

## Chemicals

4,7-dibromobenzo[*c*][1,2,5]thiadiazole, tri-*t*-butylphosphonium tetrafluoroborate, 2,5-diethoxy, 2,5-diethoxyterephthalaldehyde (DETA), 2,5-dipropoxyterephthalaldehyde (DPTA) and 2,5-dibutoxyterephthalaldehyde (DBTA), 2-(dicyclohexylphosphino)-2',4',6'-tri-*i*-propyl-1,1'-biphenyl, terephthalaldehyde (TPA), tert-butyl carbamate, 2,5-dihydroxyterephthalaldehyde tetrabutylammonium tribromide and cesium carbonate were purchased from Shanghai Bidepharm Co., Ltd. Diphenylamine, trifluoroacetic acid (TFA) and 1,2-dichlorobenzene (*o*-DCB) were purchased from Shanghai Macklin Biochemical Technology Co., Ltd. 1,3,5-trimethylbenzene (Mes) *n*-butanol (*n*-BuOH) and 2,5-dihydroxyterephthalaldehyde (DHTA) were purchased from Shanghai Aladdin Biochemical Technology Co., Ltd. All the other chemicals were obtained from the chemical supplies and used without further purification.

## Characterization

Powder X-ray diffraction (PXRD) patterns for synthesized COFs were measured using Bruker D 8 Advance X-ray diffractometer with Cu K $\alpha$  radiation. Nuclear magnetic resonance (NMR) data were collected using 400 MHz JEOL JNM-ECZ400S. The Steady-state photoluminescent spectra were recorded on FLS1000 spectrofluorometer (Edinburgh Instruments). The UV-vis spectra were recorded on Shimadzu UV-3600 spectrophotometer. The TGA data were obtained using TGA 550 (TA Instruments) analyzer and the samples were heated from room temperature to 800 °C at a ramp rate of 10 °C / min in N<sub>2</sub> atmosphere. Fourier transform infrared (FT-IR) spectra were recorded on a PerkinElmer spectrometer. Scanning electron micrographs (SEM) images were taken using a JEOLJSM-IT800 (SHL). The electron paramagnetic resonance

(EPR) measurements were performed by Bruker EMX-plus.

### **Photocatalytic H<sub>2</sub>O<sub>2</sub> production**

5 mg of COFs and 10 mL water were added into a 20 mL glass bottle, then the suspension was well dispersed by sonicating for 30 min. All photocatalytic reactions were conducted in an air atmosphere under the illumination of a 300 W xenon lamp with a UV cut-off filter at 420 nm. After the reaction is completed, 0.5 mL of sample was filtered using 0.22 μM filters. To this solution, 1 mL 0.1 M potassium hydrogen phthalate (C<sub>8</sub>H<sub>5</sub>KO<sub>4</sub>) solution and 1 mL 0.4 M/L aqueous potassium iodide (KI) solution was added, and the mixture was allowed to sit for 30 min. Under acidic conditions, photocatalytic generated H<sub>2</sub>O<sub>2</sub> molecules reacted with iodide anions (I<sup>-</sup>) to produce triiodide anions (I<sub>3</sub><sup>-</sup>), which has a strong absorption around 350 nm. The quantity of I<sub>3</sub><sup>-</sup> was determined via UV-vis spectroscopy based on the absorbance at 350 nm, which allowed the estimation of the amount of H<sub>2</sub>O<sub>2</sub> produced during each reaction.

### **Photoelectrochemical Measurements**

Photoelectrochemical measurements were conducted with a CHI660E (CH Instrument Corp, Shanghai) electrochemical workstation. Firstly, 5 mg of COFs were added into a mixed solution of 500 μL of ethanol and 50 μL of 5 wt% Nafion, which was ultrasonicated until a uniform suspension is obtained. Then, COFs suspension was dropped on the surface of ITO glass and dried at room temperature.

### **Mott-Schottky measurement**

A standard three-electrode system was used with the COF-coated ITO glass as the working electrode, Pt wire as the counter electrode and an Ag/AgCl as a reference electrode. 0.1 M Na<sub>2</sub>SO<sub>4</sub> aqueous solution was used as the electrolyte.

### **Electrochemical impedance measurement (EIS)**

A standard three-electrode system was used with the COF-coated ITO glass as the working electrode, Pt wire as the counter electrode and an Ag/AgCl as a reference electrode. 0.1 M KCl and 5 mM [Fe(CN)<sub>6</sub><sup>3-</sup>] mixed aqueous solution was used as the electrolyte.

### **Photocurrent measurement**

A standard three-electrode system was used with the COF-coated ITO glass as the working electrode, Pt wire as the counter electrode and an Ag/AgCl as a reference electrode. 0.5 M Na<sub>2</sub>SO<sub>4</sub> aqueous solution was used as the electrolyte.

### **Rotating disk electrode (RDE) measurements**

The rotating disk electrode was used as the substrate for the working electrode. Carbon rods and Ag/AgCl electrodes were used as counter and reference electrodes, respectively. 10 mg COFs were dispersed in a mixture of 0.5 mL ethanol, which was sonicated to obtain a uniform slurry. Then 200 μL samples were taken and added 20 μL Nafion (5 wt%), which was dripped onto the disc electrode and allowed to dry at room temperature. Linear sweep voltammetry (LSV) was obtained at room temperature in O<sub>2</sub>-saturated 0.1 M phosphate-buffered saline (PBS, pH = 7) solutions at with a scanning rate of 10 mV s<sup>-1</sup>. The average number of electrons (n) was calculated by Koutecky-Levich equation

$$\frac{1}{J} = \frac{1}{J_L} + \frac{1}{J_K} + \frac{1}{B\omega^{1/2}} + \frac{1}{J_K}$$

$$B = 0.62nFC_0D_0^{2/3}\omega^{1/6}$$

where J is the current density, J<sub>K</sub> and J<sub>L</sub> are the kinetic and diffusion-limiting current densities, ω is the rotating speed (rpm), n is transferred electron number, F is Faraday constant (96485 C

$\text{mol}^{-1}$ ),  $C_0$  is the bulk concentration of  $\text{O}_2$  ( $1.26 \times 10^{-3} \text{ mol cm}^{-3}$ ),  $D_0$  is the diffusion coefficient of  $\text{O}_2$  ( $2.7 \times 10^{-5} \text{ cm}^2 \text{ s}^{-1}$ ), and  $\nu$  is kinetic viscosity of the electrolyte ( $0.01 \text{ cm}^2 \text{ s}^{-1}$ ).

### **Rotating ring-disk electrode (RRDE) measurements**

RRDE (Rotating Ring-Disk Electrode) measurements were performed using a rotating ring disk system under the illumination of a 300 W Xe lamp. Voltammograms were recorded in a 0.1 M phosphate buffer solution (pH = 7) at room temperature, employing a scan rate of  $10 \text{ mV s}^{-1}$  and a rotation rate of 1600 rpm. For the detection of  $\text{O}_2$ , the potential of the ring electrode was set to  $-0.23 \text{ V}$  (vs. Ag/AgCl) under an argon atmosphere. To detect  $\text{H}_2\text{O}_2$ , the potential of the ring electrode was set to  $0.6 \text{ V}$  (vs. Ag/AgCl).

### **Photocatalytic evolution of $\cdot\text{O}_2^-$**

Tetranitroblue tetrazolium chloride (NBT,  $2 \times 10^{-4} \text{ M}$ , with an absorption maximum at 259 nm) was employed as probe molecules to determine the amount of  $\cdot\text{O}_2^-$  generated in the photocatalytic reaction. Typically, 1.0 mL NBT stock solution was introduced into our photocatalytic reaction. Suspension was collected at different time intervals and filtrated by  $0.22 \mu\text{m}$  membrane to exclude the influence of COFs for the determination of  $\cdot\text{O}_2^-$  concentration with UV-Vis spectrophotometer.

### **The procedure of $^1\text{H}$ NMR for digested COFs**

3~4 mg completely activated COF powder was digested in the mixture of DCl (20 wt% in  $\text{D}_2\text{O}$ ,  $\sim 50 \mu\text{L}$ ) and  $\text{DMSO-}d_6$  ( $\sim 500 \mu\text{L}$ ) or  $\text{CDCl}_3$  ( $\sim 500 \mu\text{L}$ ), then the mixture was sonicated for 30 min till an clear solution was obtained. The mixture solution ( $\sim 500 \mu\text{L}$ ) was used directly for  $^1\text{H}$  NMR to calculate the actual linker ratio in the HIAM-0023-X% COFs compound. All experiments and characterizations were repeated twice. The actual linker ratios in these COF

compounds were calculated based on integrations of resonance peak intensities. The results were showed in Tables S1.

### Synthesis of *N*<sup>4</sup>,*N*<sup>4</sup>,*N*<sup>7</sup>,*N*<sup>7</sup>-tetraphenylbenzo[*c*][1,2,5]thiadiazole-4,7-diamine

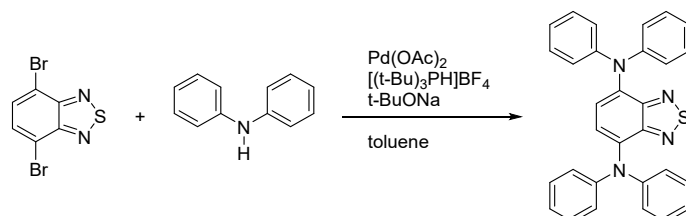

A mixture of 4,7-dibromobenzo[*c*][1,2,5]thiadiazole (5.88 g, 20.0 mmol), diphenylamine (10.15 g, 60.0 mmol), Pd(OAc)<sub>2</sub> (224.5 mg, 1.0 mmol), [(*t*-Bu)<sub>3</sub>PH]BF<sub>4</sub> (870.4 mg, 3.0 mmol) and *t*-BuONa (38.44 g, 400.0 mmol) in anhydrous toluene (200 mL) was heated at reflux overnight under a nitrogen atmosphere. After cooling to room temperature, the resulting mixture was diluted with H<sub>2</sub>O and ethyl acetate, and the organic layer was washed with brine and water, and dried over Na<sub>2</sub>SO<sub>4</sub>. The combined organic layer was concentrated under reduced pressure and the residue was purified by silica-gel column chromatography to give a red solid (8.3 g, 88%). <sup>1</sup>H NMR (400 MHz, CDCl<sub>3</sub>) δ<sub>H</sub> (ppm) 7.29-7.26 (8H); 7.11-7.04 (14H).

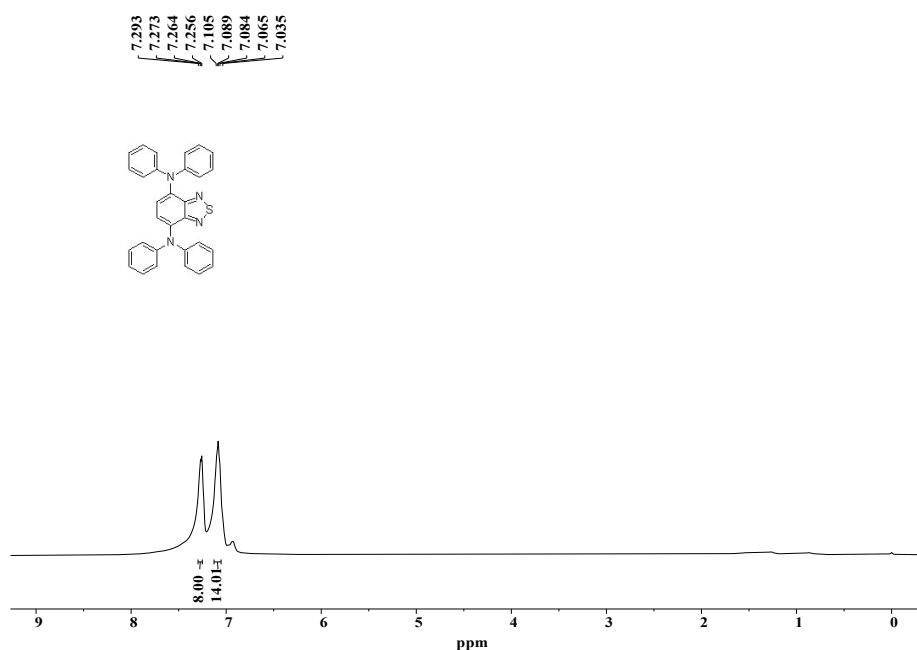

Figure S1.  $^1\text{H}$  NMR spectrum of  $N^4,N^4,N^7,N^7$ -tetraphenylbenzo[*c*][1,2,5]thiadiazole-4,7-diamine in  $\text{CDCl}_3$ .

### Synthesis of $N^4,N^4,N^7,N^7$ -tetrakis(4-bromophenyl)benzo[*c*][1,2,5]thiadiazole-4,7-diamine

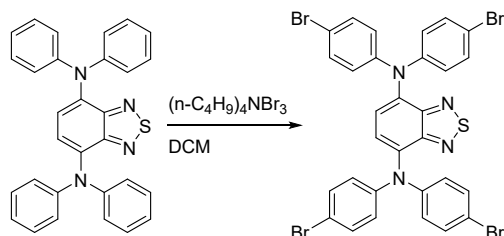

To a solution of  $N^4,N^4,N^7,N^7$ -tetraphenylbenzo[*c*][1,2,5]thiadiazole-4,7-diamine (8.3 g, 17.64 mmol) in dichloromethane (DCM, 600 mL) was added  $(n\text{-C}_4\text{H}_9)_4\text{NBr}_3$  (85.04 g, 176.4 mmol) at room temperature. After the mixture was stirred overnight, the resulting mixture was concentrated under reduced pressure. The residue was purified by silica-gel column chromatography to afford target compound as a red solid (5.1 g, 36%).  $^1\text{H}$  NMR (400 MHz,  $\text{CDCl}_3$ )  $\delta_{\text{H}}$  (ppm) 7.35 (8H), 7.10 (2H), 6.93 (8H).

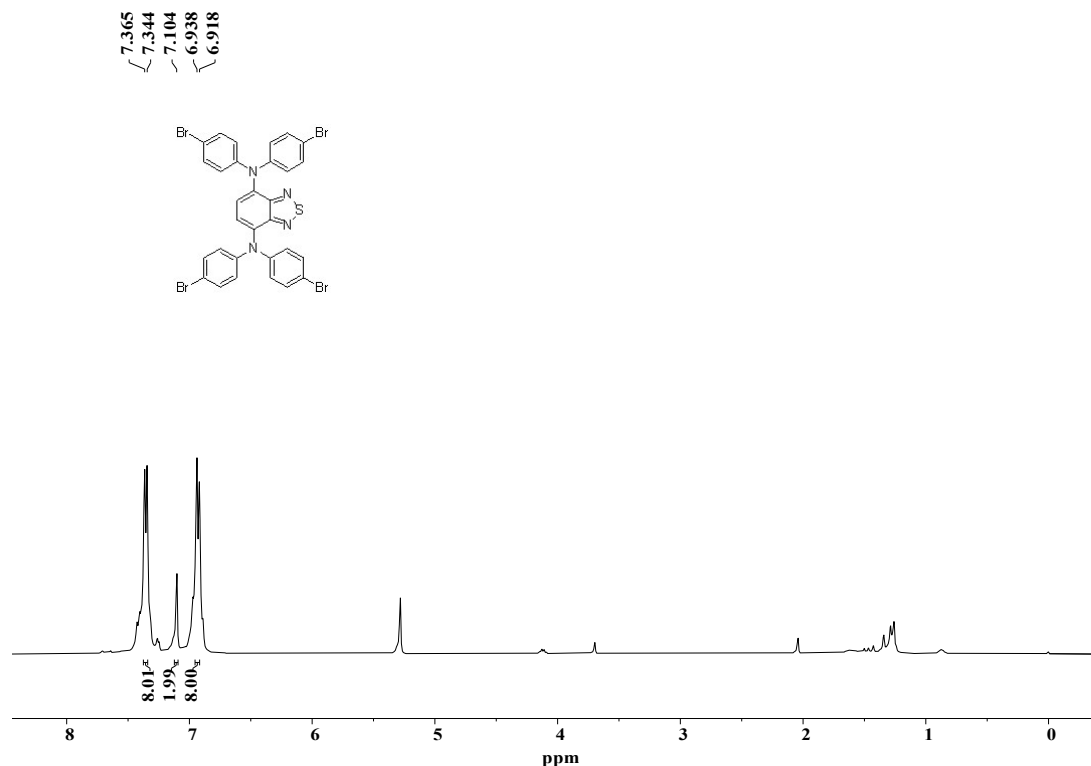

Figure S2.  $^1\text{H}$  NMR spectrum of compound  $N^4,N^4,N^7,N^7$ -tetrakis(4-bromophenyl)benzo[*c*][1,2,5]thiadiazole-4,7-diamine in  $\text{CDCl}_3$ .

**Synthesis of tetra-*tert*-butyl ((benzo[*c*][1,2,5]thiadiazole-4,7-diylbis(azanetriyl))tetrakis(benzene-4,1-diyl))tetracarbamate**

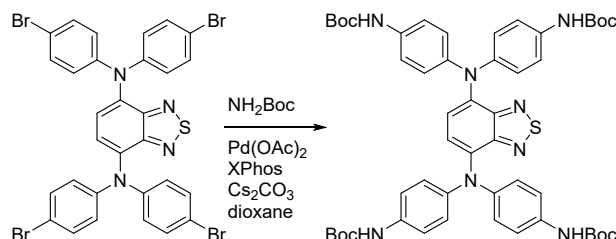

A mixture of  $N^4,N^4,N^7,N^7$ -tetrakis(4-bromophenyl)benzo[*c*][1,2,5]thiadiazole-4,7-diamine (786.2 mg, 1.0 mmol), *t*-butyl carbamate (702.9 mg, 6.0 mmol),  $\text{Pd}(\text{OAc})_2$  (27 mg, 0.12 mmol), 9,9-dimethyl-4,5-bis(diphenylphosphino)xanthene (XPhos, 171.7 mg, 0.36 mmol) and cesium carbonate (1.82 g, 5.6 mmol) was put in a flask. Under a nitrogen atmosphere, anhydrous dioxane (32 mL) was added through a syringe and the mixture was heated at  $100\text{ }^\circ\text{C}$  overnight. After cooling to room temperature, the mixture was concentrated under reduced pressure. The residue was purified by silica-gel column chromatography to produce target compound as a dark-purple solid (789.9 mg, 84%).  $^1\text{H}$  NMR (400 MHz,  $\text{DMSO-}d_6$ )  $\delta_{\text{H}}$  (ppm) 9.19 (4H), 7.29 (8H), 6.96 (2H), 6.83 (8H), 1.42 (36H).  $^{13}\text{C}$  NMR (101 MHz,  $\text{DMSO-}d_6$ )  $\delta_{\text{C}}$  (ppm) 153.4, 152.5, 142.7, 135.6, 135.2, 124.5, 124.1, 119.9, 79.4, 28.7.



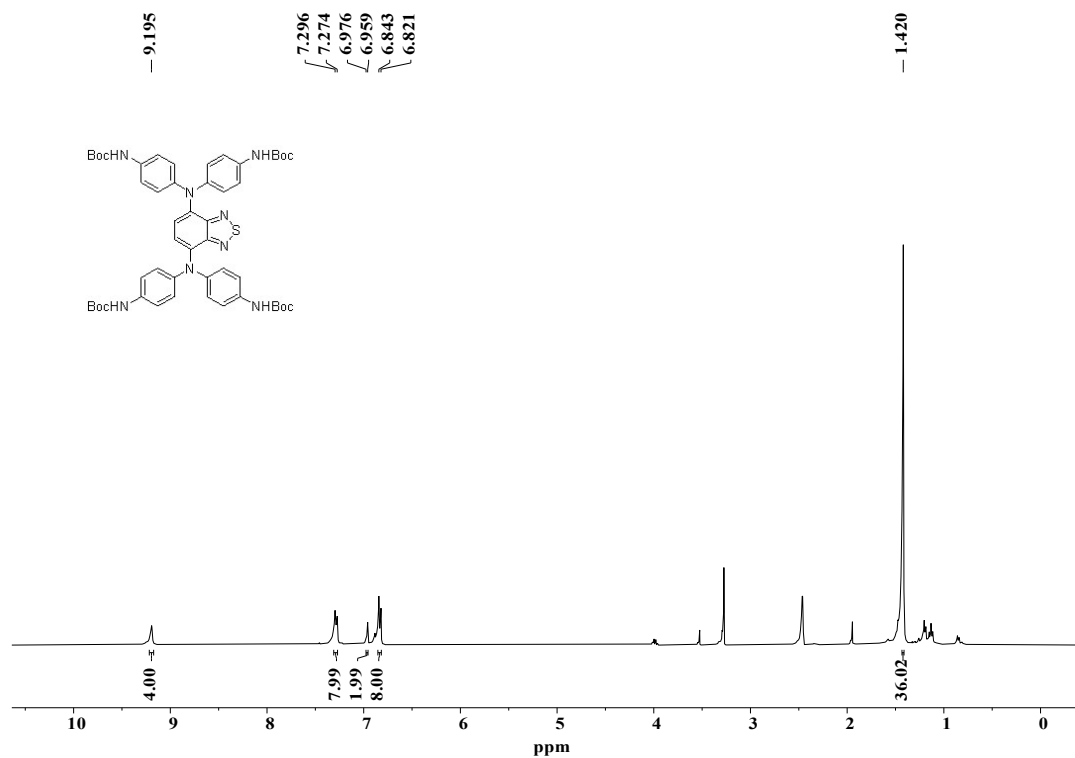

Figure S3. <sup>1</sup>H NMR spectrum of compound tetra-*tert*-butyl ((benzo[*c*][1,2,5]thiadiazole-4,7-diylbis(azanetriyl))tetrakis(benzene-4,1-diyl))tetracarbamate in DMSO-*d*<sub>6</sub>.

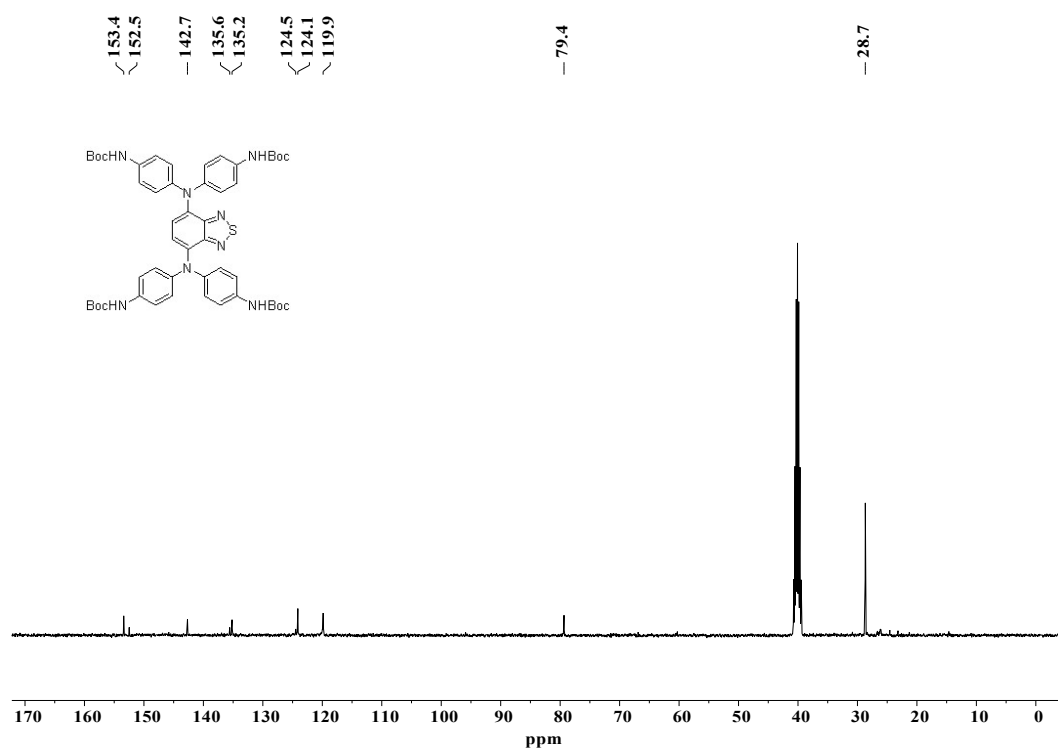

Figure S4. <sup>13</sup>C NMR spectrum of compound tetra-*tert*-butyl ((benzo[*c*][1,2,5]thiadiazole-4,7-diylbis(azanetriyl))tetrakis(benzene-4,1-diyl))tetracarbamate in DMSO-*d*<sub>6</sub>.

**Synthesis of  $N^l, N^{l'}$ -(benzo[*c*][1,2,5]thiadiazole-4,7-diyl)bis( $N^l$ -(4-aminophenyl) benzene-1,4-diamine) (BTAPA)**

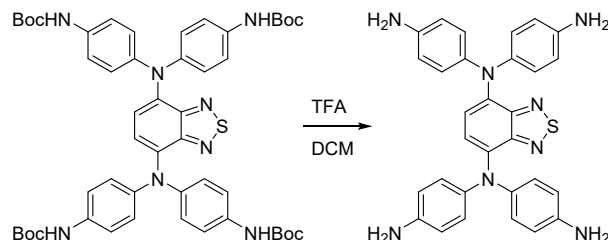

Trifluoroacetic acid (TFA, 50 mL) was dropwisely added to a solution of tetra-*tert*-butyl((benzo[*c*][1,2,5]thiadiazole-4,7-diyl)bis(azanetriyl))tetrakis(benzene-4,1-diyl)) tetracarbamate in DCM (100 mL) in ice-water bath under nitrogen atmosphere. After the mixture was stirred another 1 h at room temperature, the solvent was removed under reduced pressure. The residue was diluted with DCM and the organic layer was washed with NaHCO<sub>3</sub> and 0.1 M NaOH, brine and water. The combined organic layers were dried over Na<sub>2</sub>SO<sub>4</sub> and the solvent was removed under reduced pressure. The residue was purified by silica-gel column chromatography to give  $N^l, N^{l'}$ -(benzo[*c*][1,2,5]thiadiazole-4,7-diyl)bis( $N^l$ -(4-aminophenyl)benzene-1,4-diamine) (BTAPA) as a black solid (1.17 g, 69%). <sup>1</sup>H NMR (400 MHz, CDCl<sub>3</sub>)  $\delta_H$  (ppm) 6.86-6.82 (10H), 6.57 (8H), 3.53 (8H). <sup>13</sup>C NMR (101 MHz, CDCl<sub>3</sub>)  $\delta_C$  (ppm) 152.1, 141.9, 140.5, 135.7, 125.3, 122.3, 116.1.

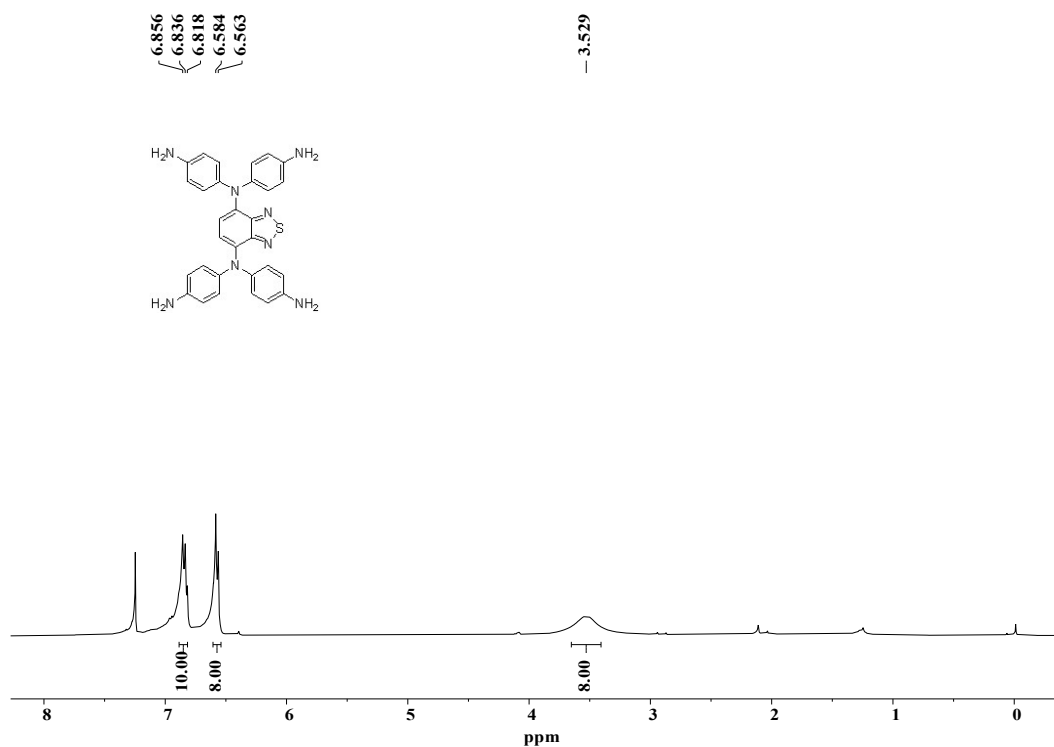

Figure S5.  $^1\text{H}$  NMR spectrum of compound  $N^1, N^{1'}$ -(benzo[*c*][1,2,5]thiadiazole-4,7-diyl)bis( $N^1$ -(4-aminophenyl)benzene-1,4-diamine) (BTAPA) in  $\text{CDCl}_3$ .

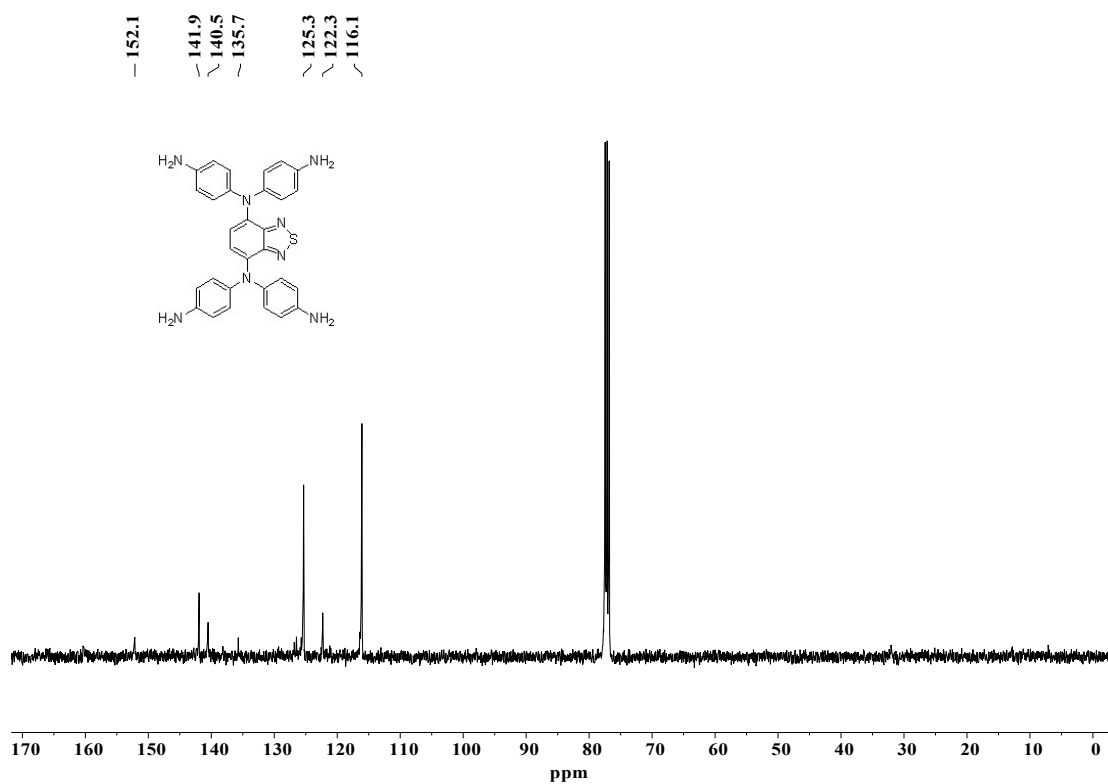

Figure S6.  $^{13}\text{C}$  NMR spectrum of compound  $N^1, N^{1'}$ -(benzo[*c*][1,2,5]thiadiazole-4,7-diyl)bis( $N^1$ -(4-aminophenyl)benzene-1,4-diamine) (BTAPA) in  $\text{CDCl}_3$ .

## Synthesis of HIAM-0022

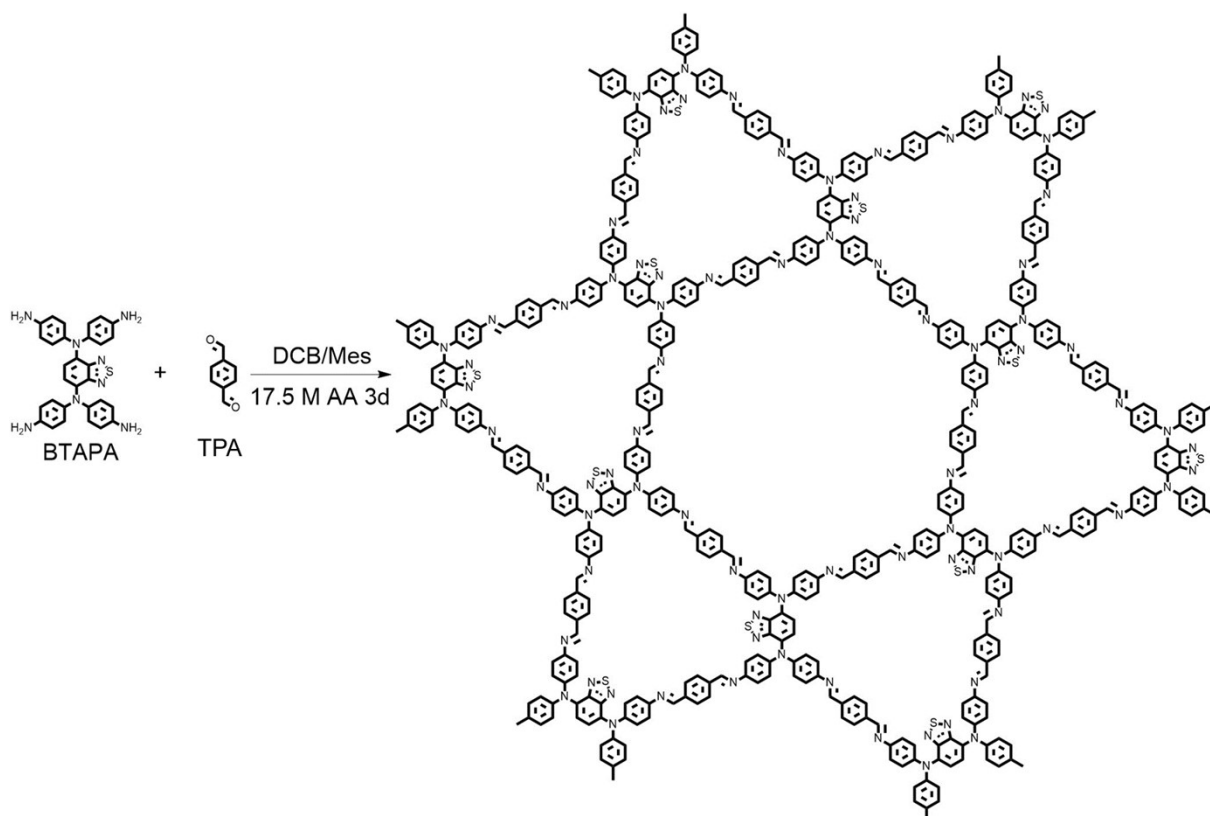

A Pyrex tube (10 mL) containing BTAPA (26 mg, 0.05 mmol), TPA (26 mg, 0.2 mmol), *o*-dichlorobenzene (*o*-DCB, 0.5 mL) and mesitylene (0.5 mL) was sonicated for 10 min. Then 17.5 M aqueous acetic acid (0.4 mL) was added to the above mixture solution. The tube was degassed through three freeze-pump-thaw cycles and then kept at 120 °C for 72 h. After cooling to room temperature, the precipitate was collected by filtration and washed with THF for several times. Then the black solid was Soxhlet extracted in THF for 24 h and dried under 120 °C vacuum to afford HIAM-0022.

## Synthesis of HIAM - 0023

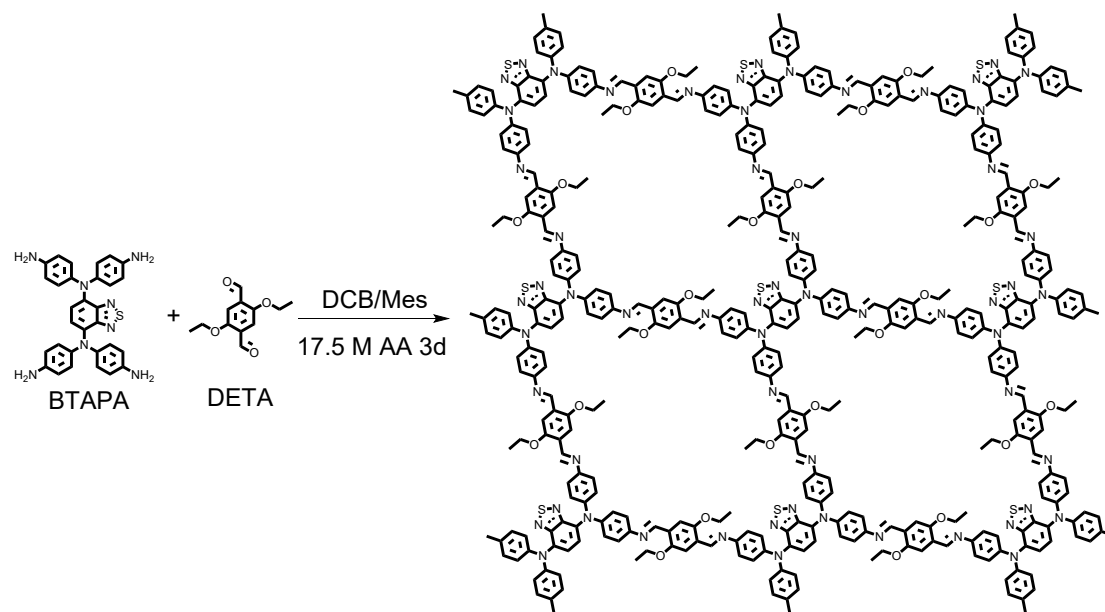

A Pyrex tube (10 mL) containing BTAPA (21 mg, 0.04 mmol), DETA (35 mg, 0.16 mmol), *o*-dichlorobenzene (*o*-DCB, 0.5 mL) and mesitylene (0.5 mL) was sonicated for 10 min. Then 17.5 M aqueous acetic acid (0.4 mL) was added to the above mixture solution. The tube was degassed through three freeze-pump-thaw cycles and then with kept at 120 °C for 72 h. After cooling to room temperature, the precipitate was collected by filtration and washed with THF for several times. Then the black solid was Soxhlet extracted in THF for 24 h and dried under 120 °C vacuum to afford HIAM-0023.

## Synthesis of HIAM-0024

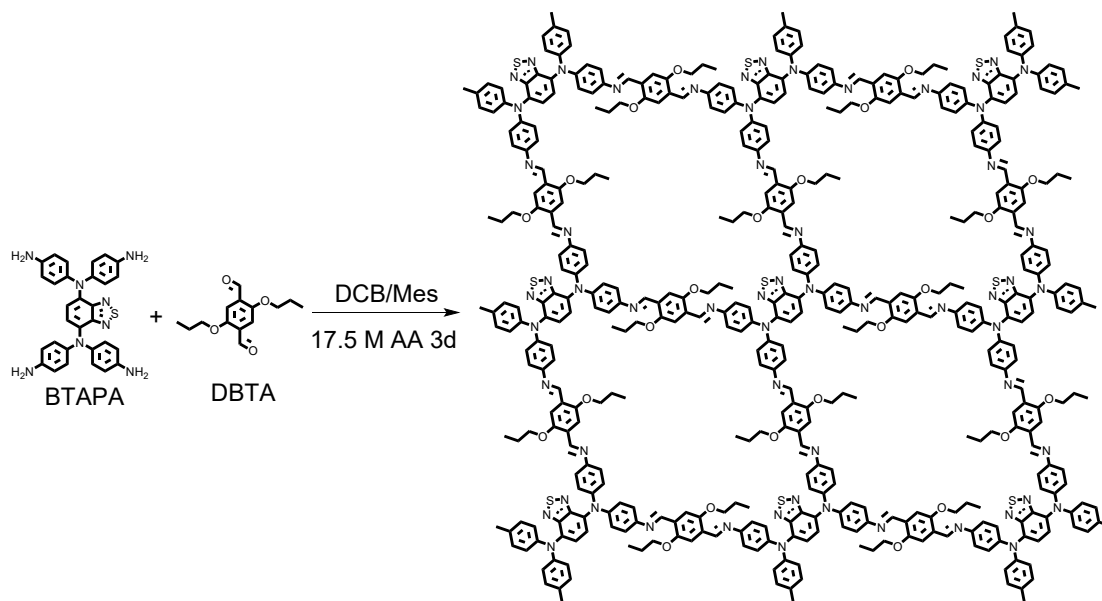

A Pyrex tube (10 mL) containing BTAPA (21 mg, 0.04 mmol), DBTA (40 mg, 0.16 mmol), *o*-dichlorobenzene (*o*-DCB, 0.5 mL) and mesitylene (0.5 mL) was sonicated for 10 min. Then 17.5 M aqueous acetic acid (0.4 mL) was added to the above mixture solution. The tube was degassed through three freeze-pump-thaw cycles and then kept at 120 °C for 72 h. After cooling to room temperature, the precipitate was collected by filtration and washed with THF for several times. Then the black solid was Soxhlet extracted in THF for 24 h and dried under 120 °C vacuum to afford HIAM-0024.

## Synthesis of HIAM-0025

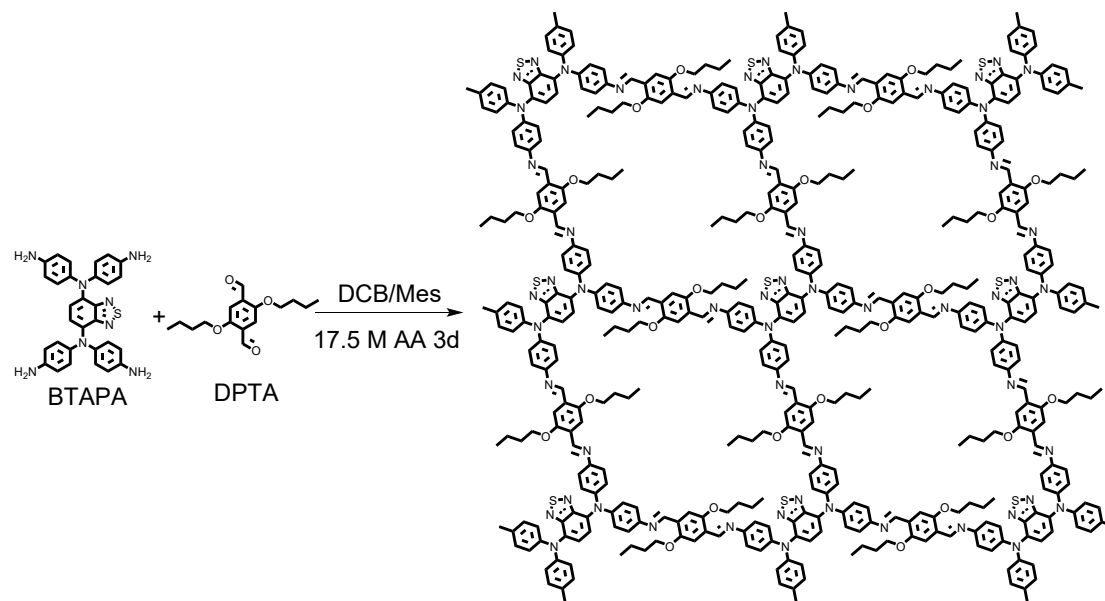

A Pyrex tube (10 mL) containing BTAPA (21 mg, 0.04 mmol), DPTA (44 mg, 0.16 mmol), *o*-dichlorobenzene (*o*-DCB, 0.5 mL) and mesitylene (0.5 mL) was sonicated for 10 min. Then 17.5 M aqueous acetic acid (0.4 mL) was added to the above mixture solution. The tube was degassed through three freeze-pump-thaw cycles and then kept at 120 °C for 72 h. After cooling to room temperature, the precipitate was collected by filtration and washed with THF for several times. Then the black solid was Soxhlet extracted in THF for 24 h and dried under 120 °C vacuum to afford HIAM-0025.

## Synthesis of HIAM-0023-X% (X = 12.5, 25, 37.5, 50)

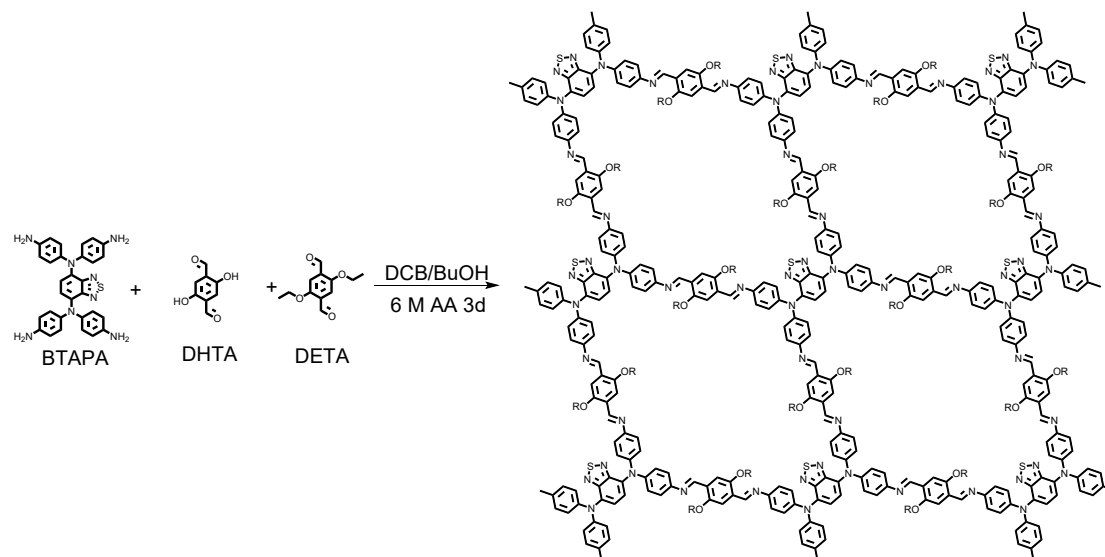

A Pyrex tube (10 mL) containing BTAPA (21 mg, 0.04 mmol), DHTA (1.7 mg, 0.01 mmol), DETA (16 mg, 0.07 mmol), *o*-dichlorobenzene (*o*-DCB, 1.5 mL) and *n*-butanol (0.5 mL) was sonicated for 10 min. Then 6 M aqueous acetic acid (0.2 mL) was added to the above mixture solution. The tube was degassed through three freeze-pump-thaw cycles and then with kept at 120 °C for 72 h. After cooling to room temperature, the precipitate was collected by filtration and washed with THF for several times. Then the black solid was Soxhlet extracted in THF for 24 h and dried under 120 °C vacuum to afford HIAM-0023-12.5%.

Other three COFs were also prepared through the similar procedure only by varying the precursor amount of DHTA and DETA.

HIAM-0023-25% : 3.3 mg, 0.02 mmol DHTA and 13 mg, 0.06 mmol DETA.

HIAM-0023-37.5% : 5 mg, 0.03 mmol DHTA and 11 mg, 0.05 mmol DETA.

HIAM-0023-50% : 6.4 mg, 0.04 mmol DHTA and 9 mg, 0.04 mmol DETA.



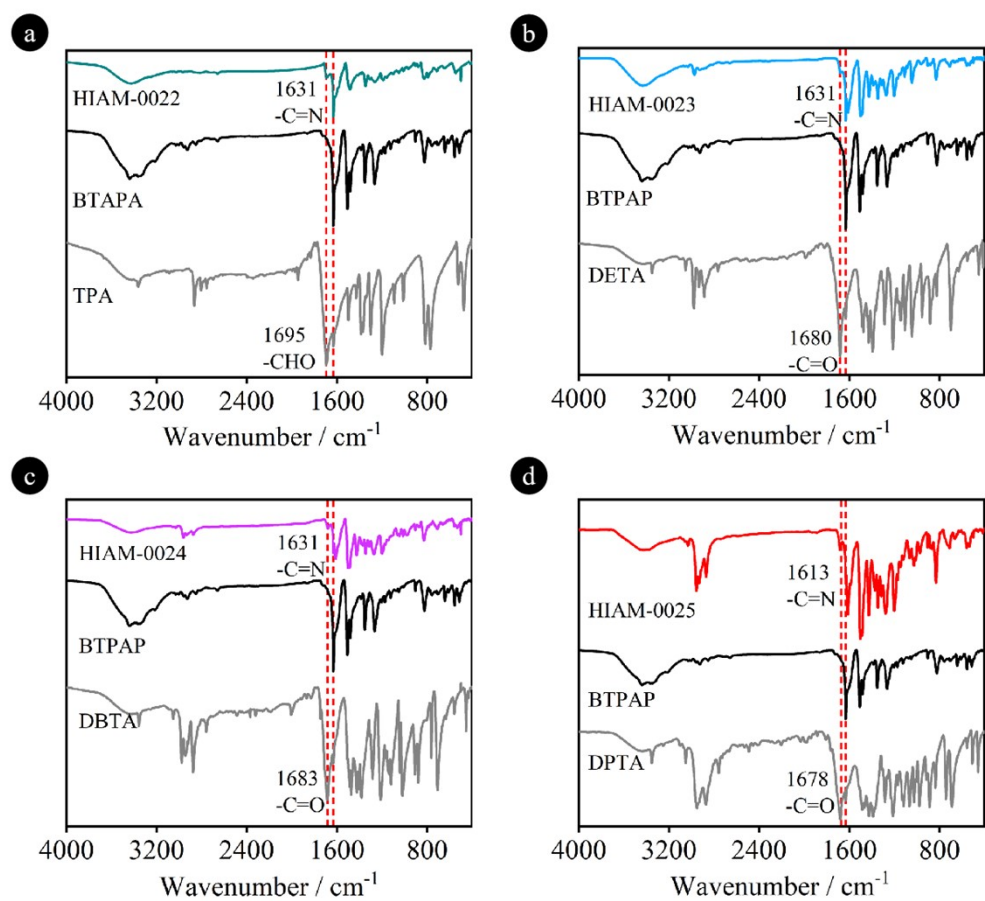

Figure S7. The FT-IR spectra of (a) HIAM-0022, (b) HIAM-0023, (c) HIAM-0024 and (d) HIAM-0025 and the corresponding organic building units.

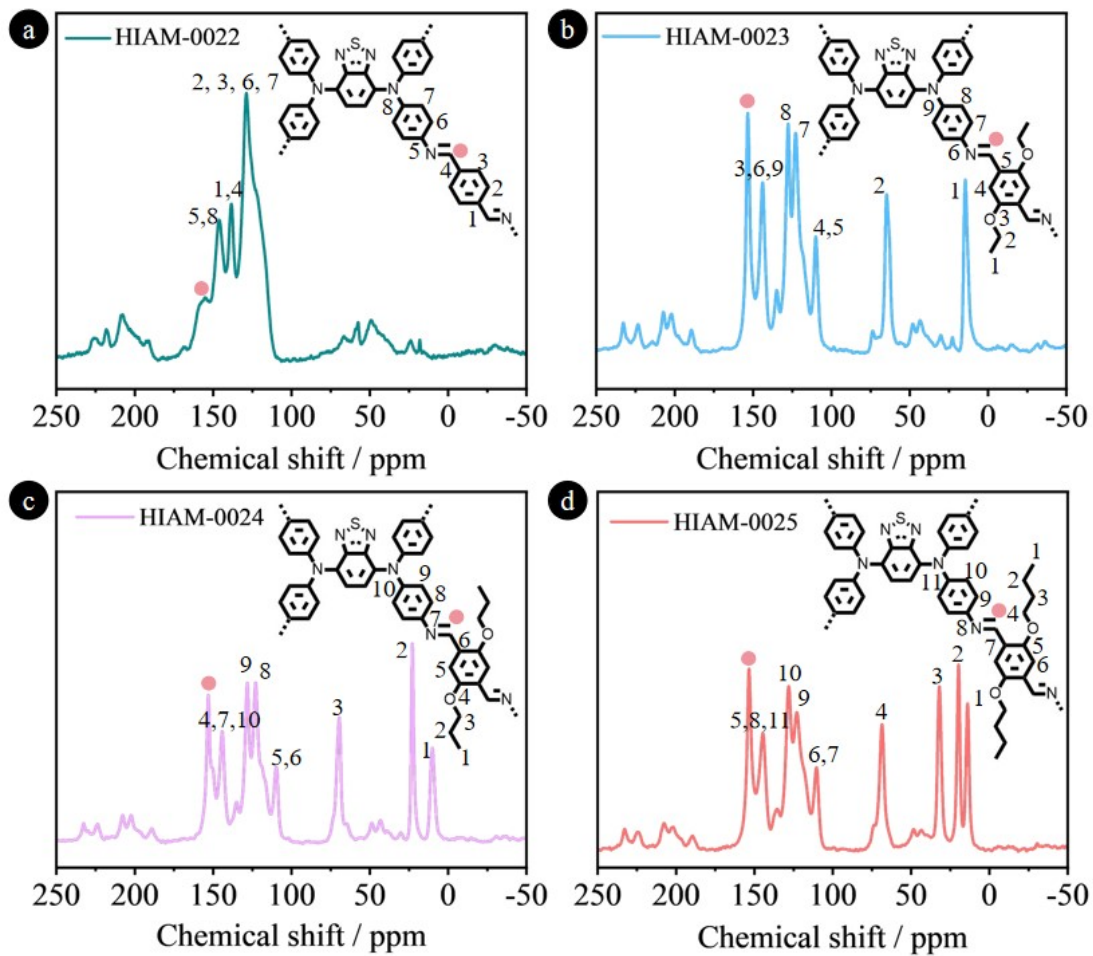

Figure S8. Solid-state  $^{13}\text{C}$  NMR spectra of (a) HIAM-0022, (b) HIAM-0023, (c) HIAM-0024 and (d) HIAM-0025.

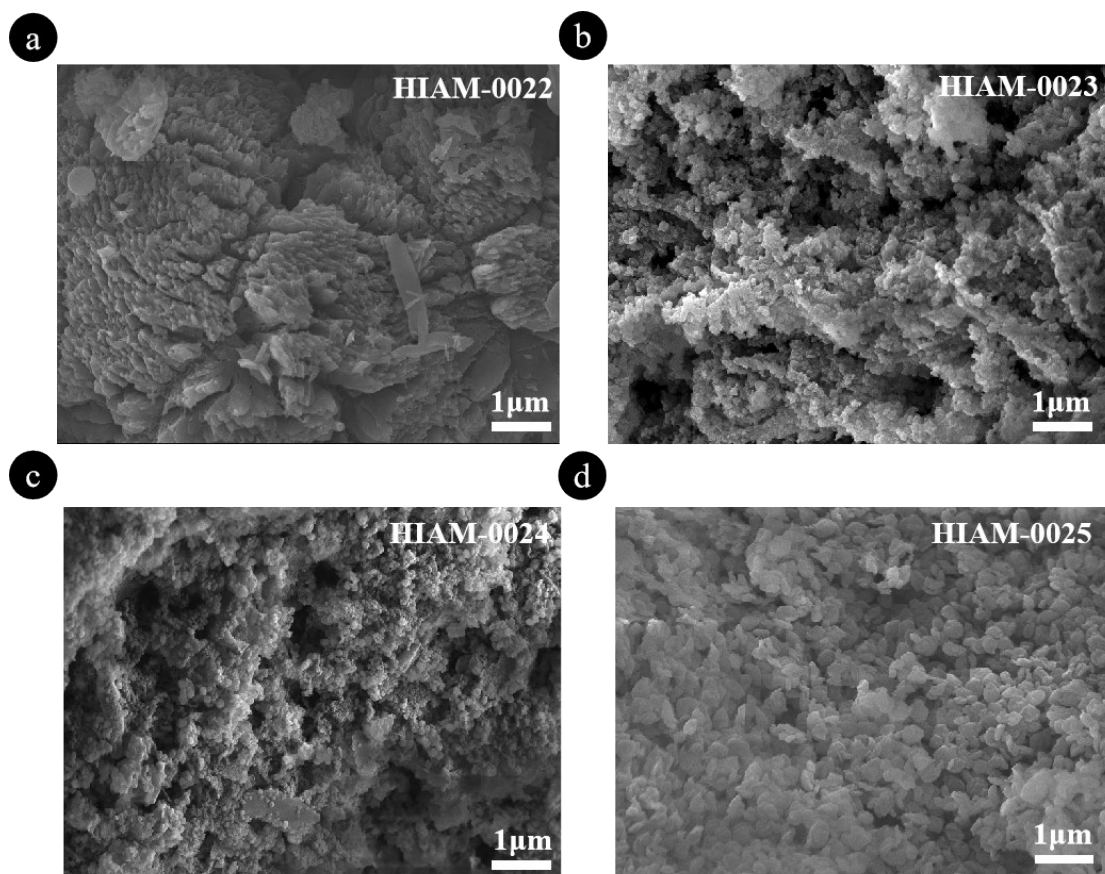

Figure S9. SEM images of (a) HIAM-0022, (b) HIAM-0023, (c) HIAM-0024 and (5) HIAM-0025.

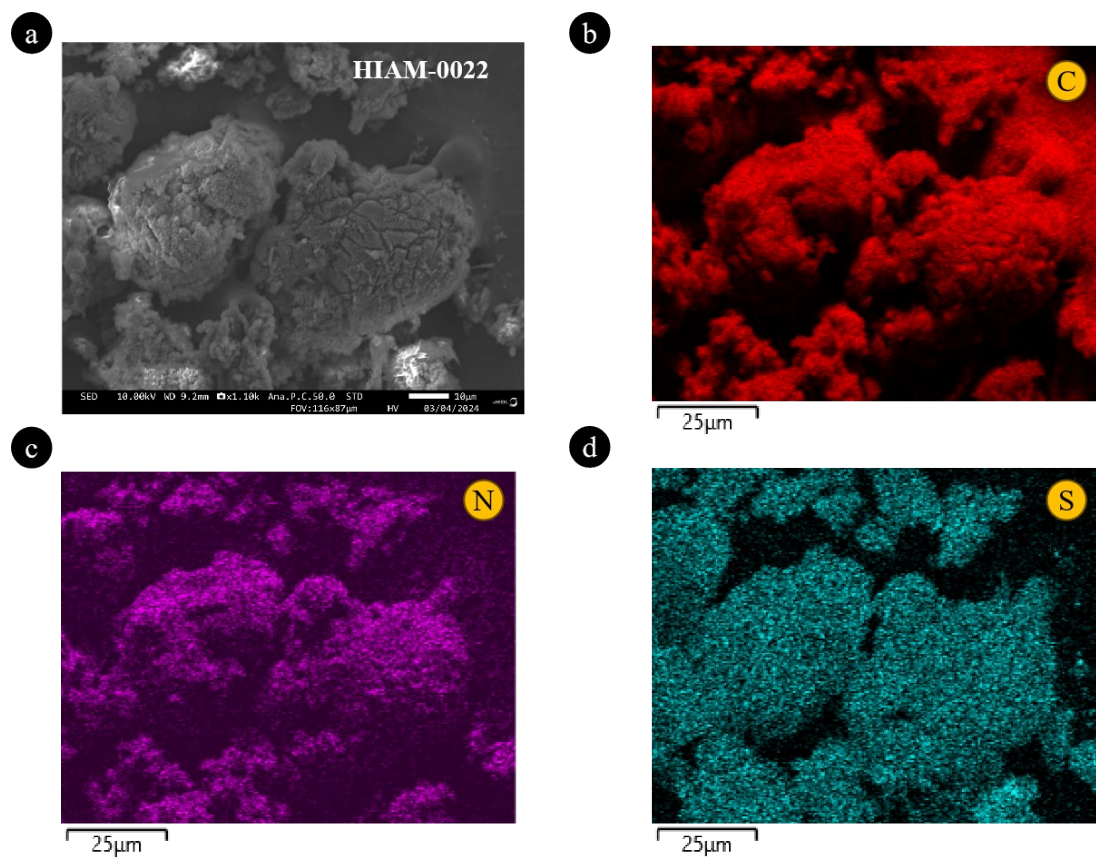

Figure S10. Energy dispersive X-ray analysis of HIAM-0022.

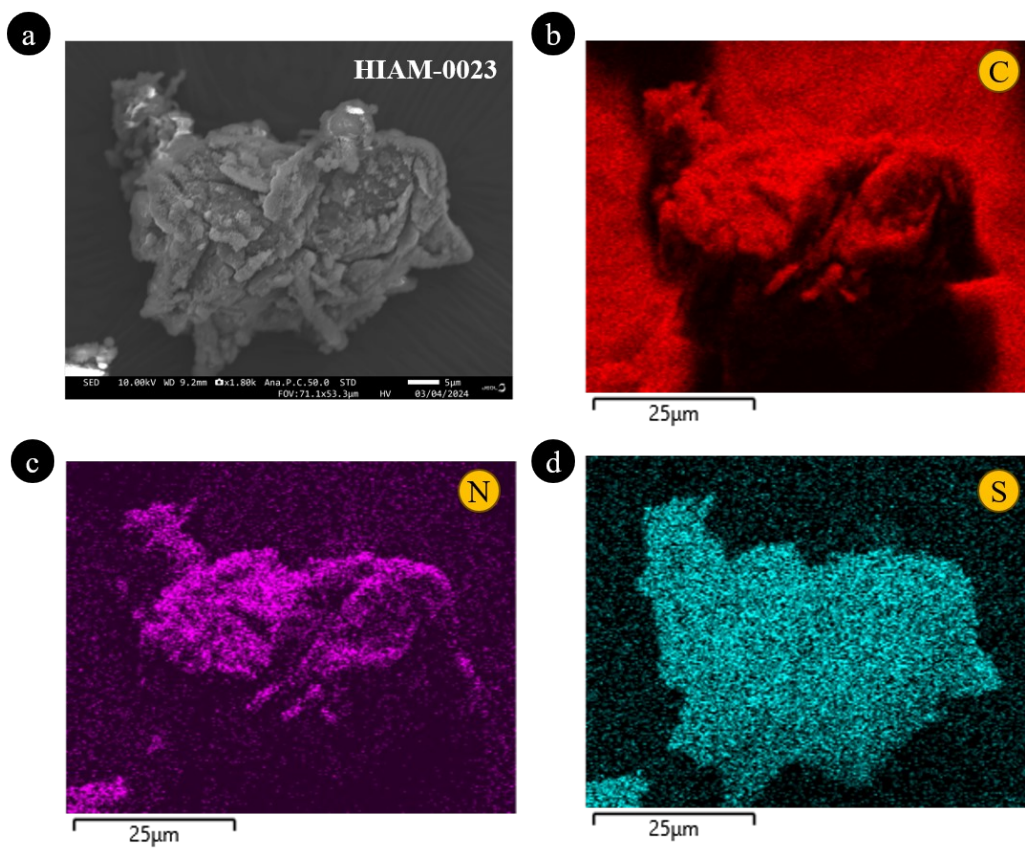

Figure S11. Energy dispersive X-ray analysis of HIAM-0023.

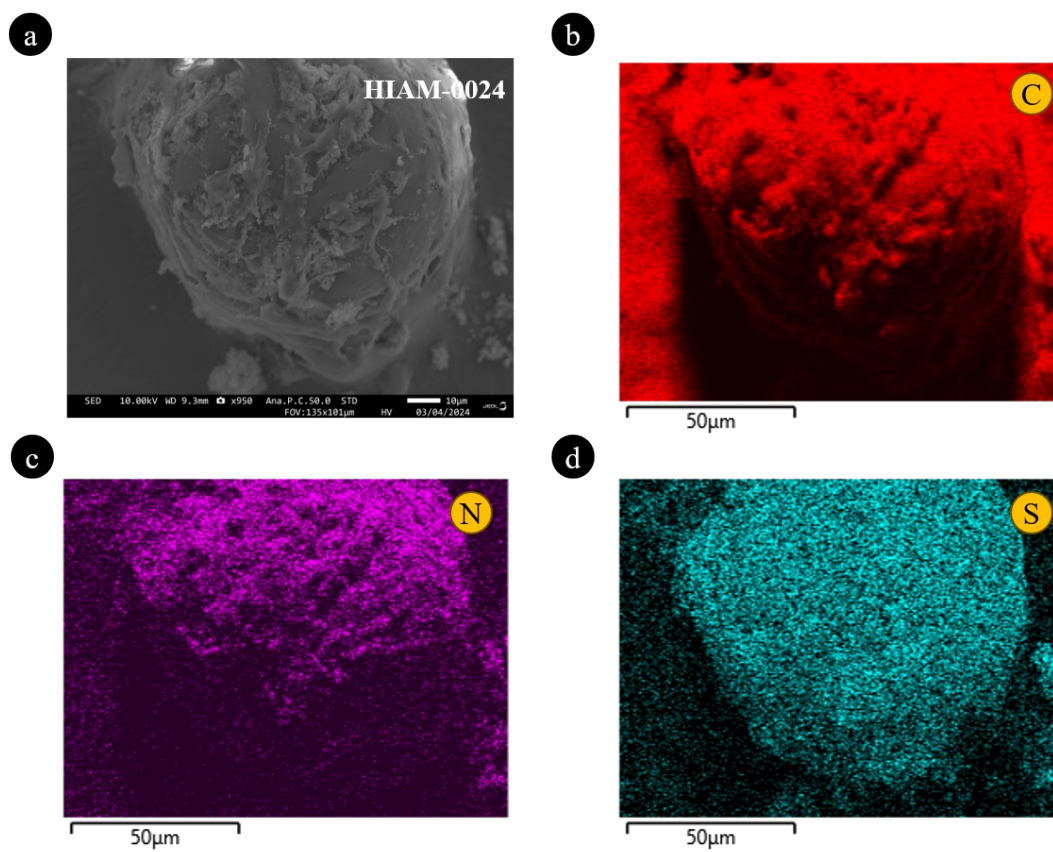

Figure S12. Energy dispersive X-ray analysis of HIAM-0024.

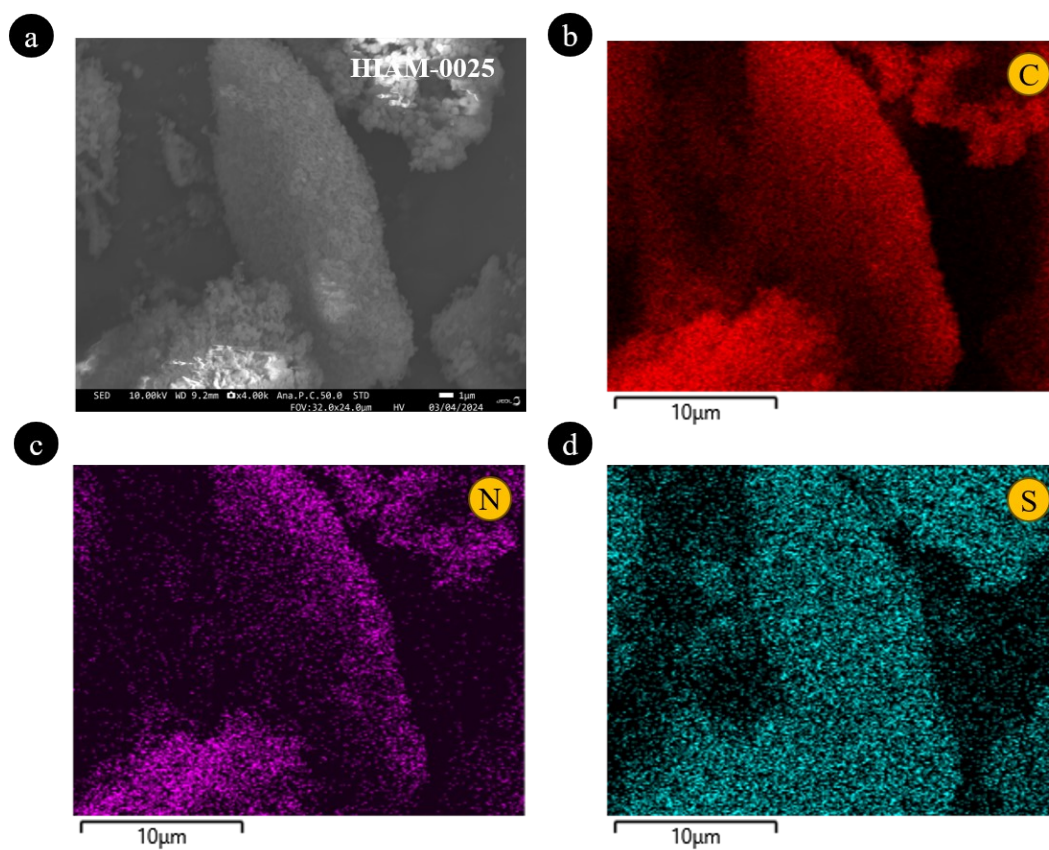

Figure S13. Energy dispersive X-ray analysis of HIAM-0025.

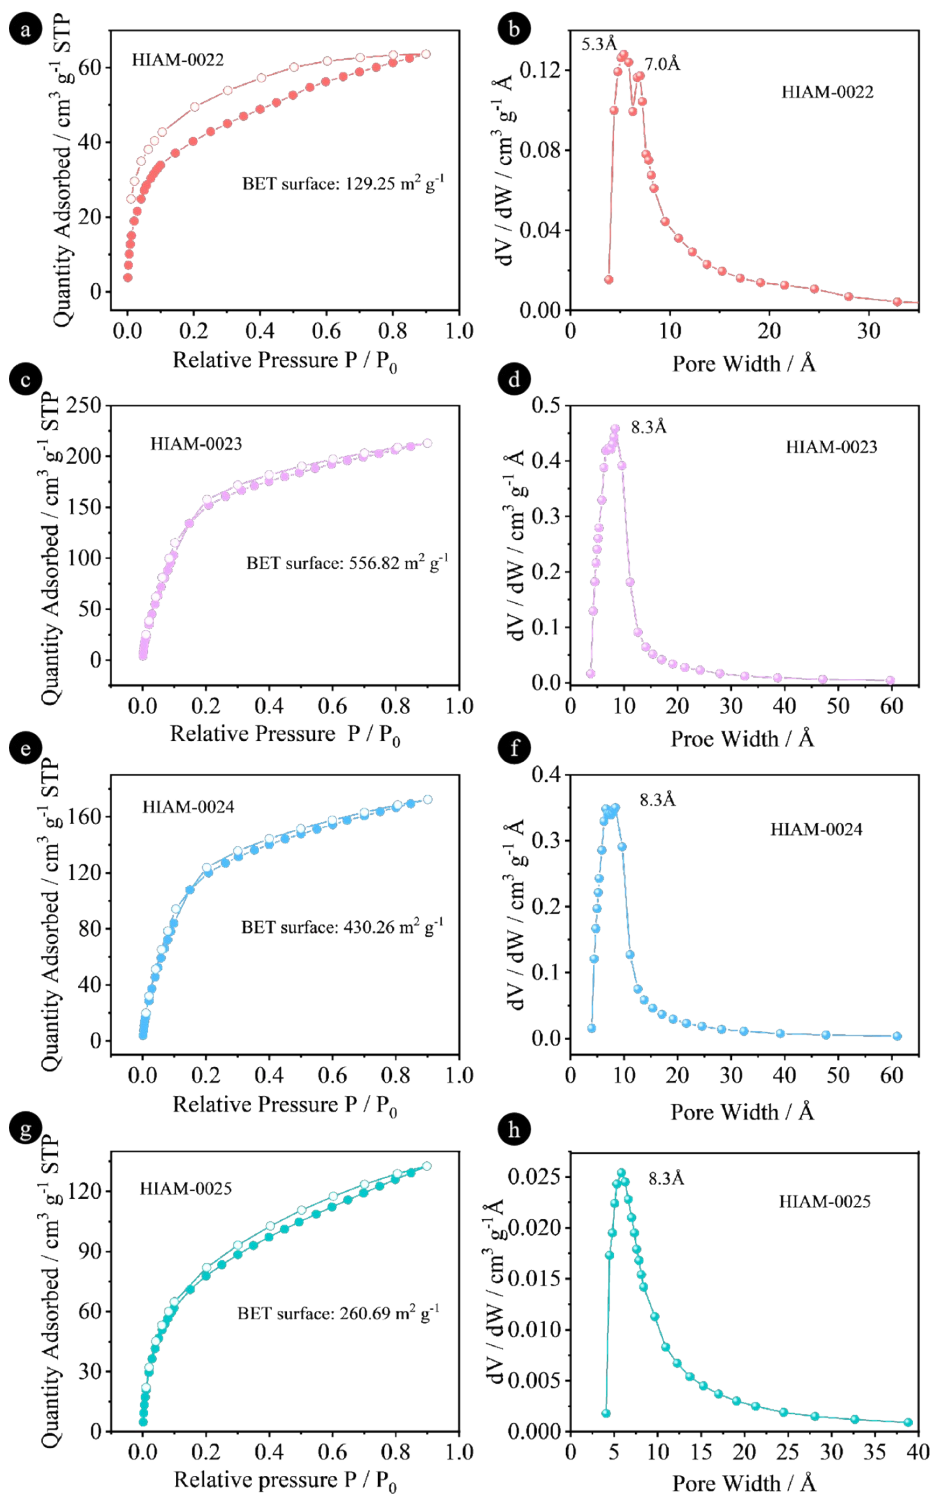

Figure S14. The CO<sub>2</sub> adsorption-desorption isotherms of (a) HIAM-0022, (c) HIAM-0023, (e) HIAM-0024 and (g) HIAM-0025. The calculated pore size distributions of (b) HIAM-0022, (d) HIAM-0023, (f) HIAM-0024 and (h) HIAM-0025.



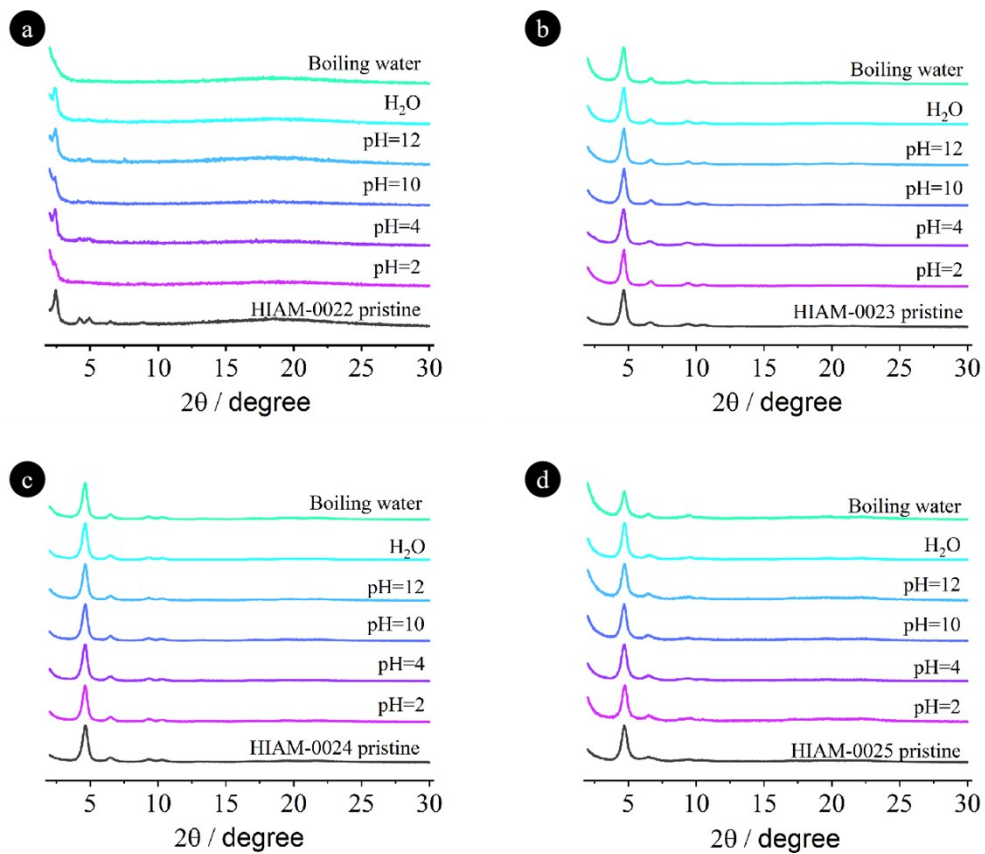

Figure S15. The PXRD patterns of (a) HIAM-0022, (b) HIAM-0023, (c) HIAM-0024 and (d) HIAM-0025 after treatment under various conditions for 24 hours.

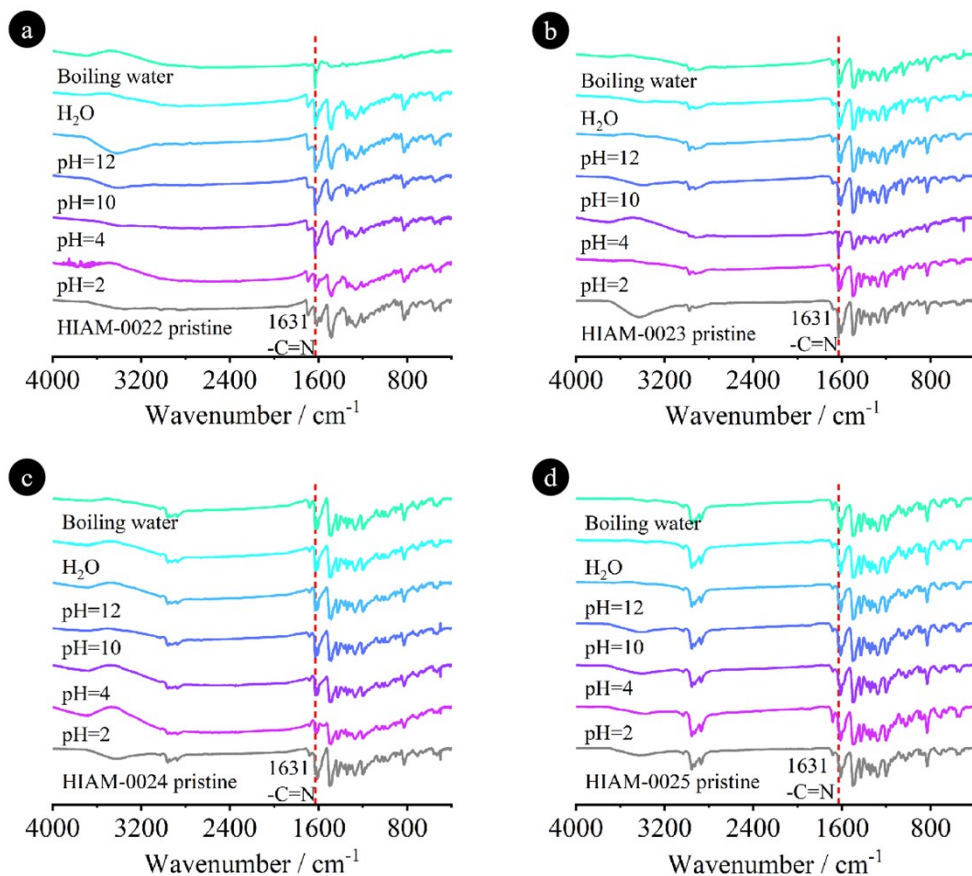

Figure S16. The FT-IR spectra of (a) HIAM-0022, (b) HIAM-0023, (c) HIAM-0024 and (d) HIAM-0025 after treatment under various conditions for 24 hours.

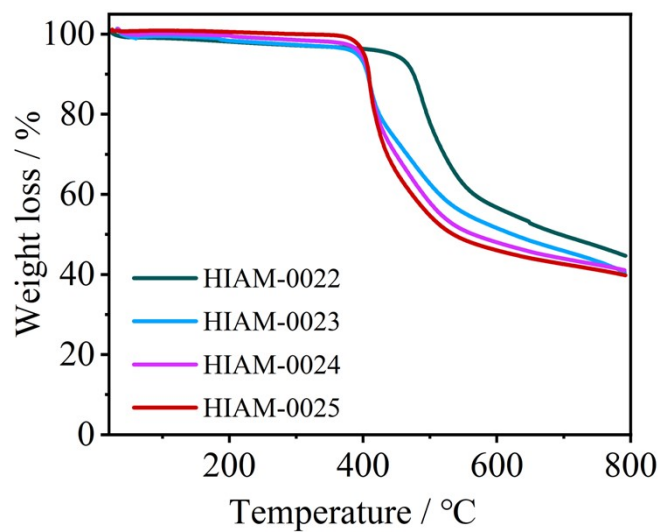

Figure S17. TGA curves of HIAM-0022, HIAM-0023, HIAM-0024 and HIAM-0025.

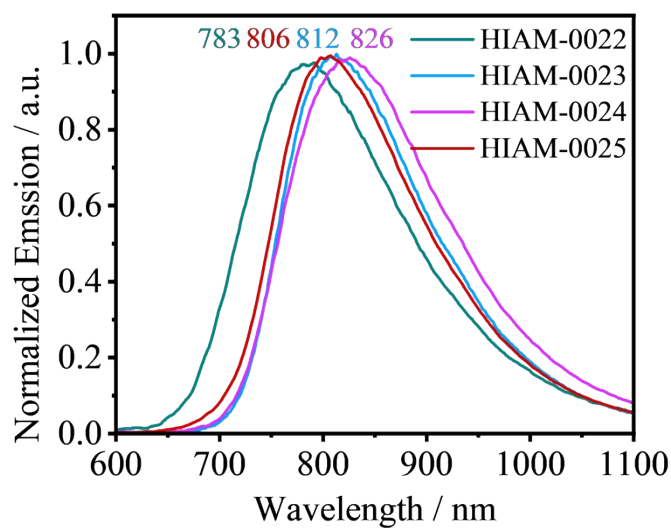

Figure S18. Normalized emission spectra of the HIAM-0022, HIAM-0023, HIAM-0024 and HIAM-0025.

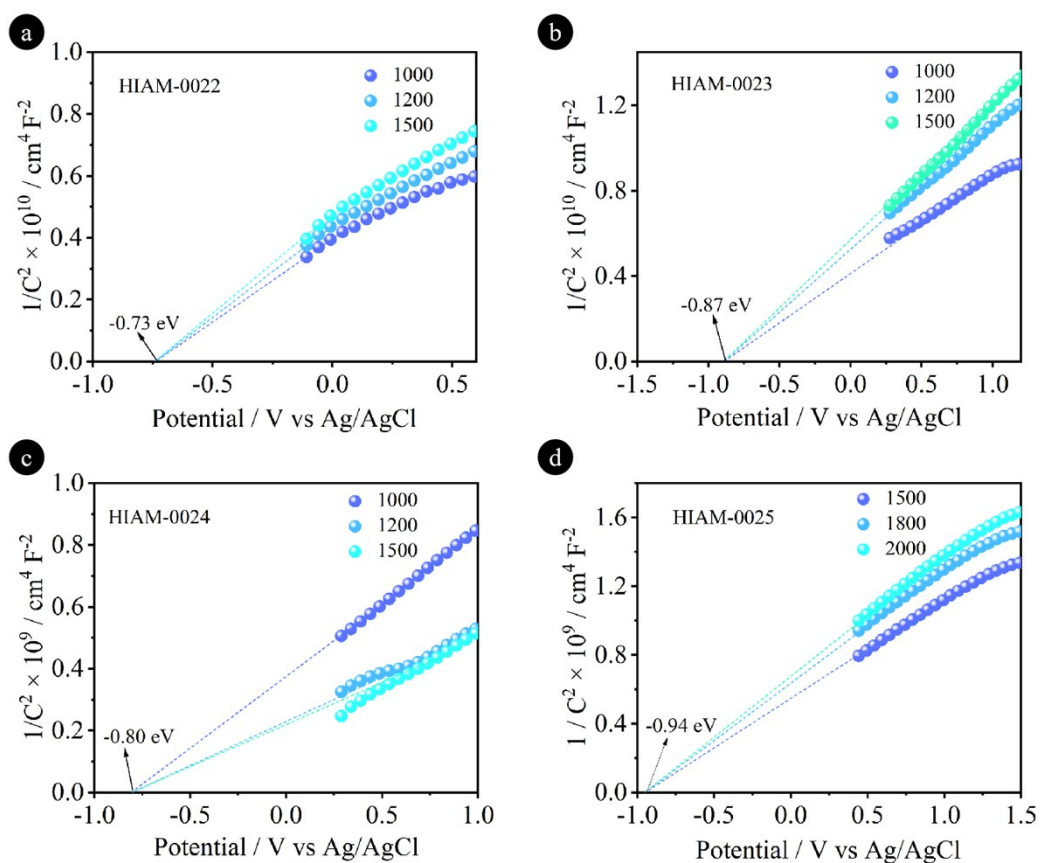

Figure S19. Mott-Schottky plots of (a) HIAM-0022, (b) HIAM-0023, (c) HIAM-0024 and (d) HIAM-0025.

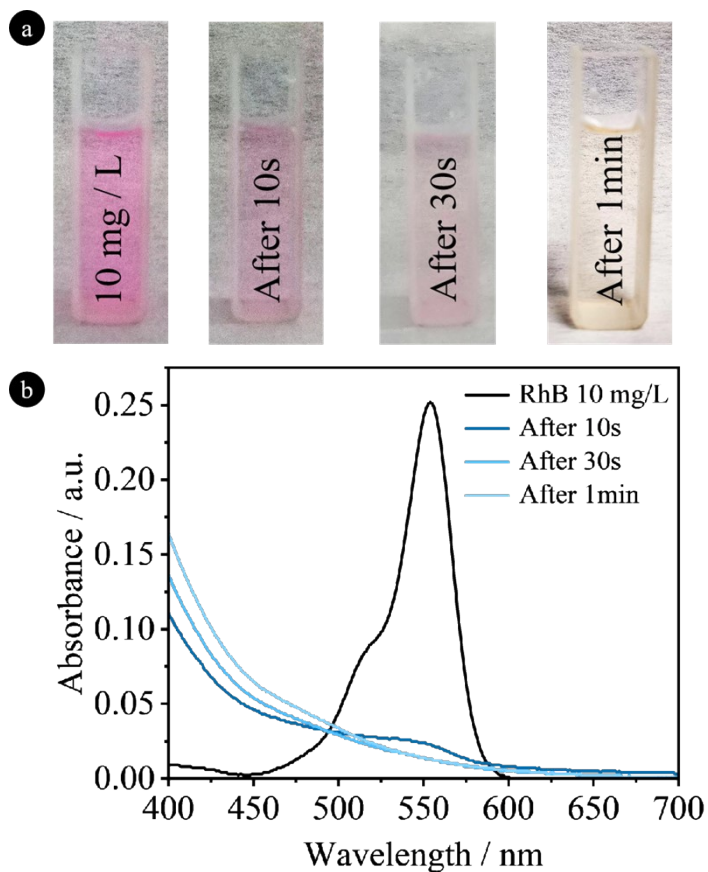

Figure S20. The RhB ( $10 \text{ mg L}^{-1}$ ) decomposition using produced  $\text{H}_2\text{O}_2$  solution via a Fenton reaction: (a) Color change with time and (b) its corresponding absorbance. Detailed process: 10 mg of RhB and 278 mg of  $\text{FeSO}_4 \cdot 7\text{H}_2\text{O}$  were dissolved in a 1 L of volumetric flask. Taking out 2 mL of RhB solution and put it in a 4 mL cuvette, and then 1 mL of photocatalytic  $\text{H}_2\text{O}_2$  solution after a prolonged photocatalytic reaction (8 h) was added. The color change of RhB and absorbance were recorded at 10 s, 30 s and 1 min.

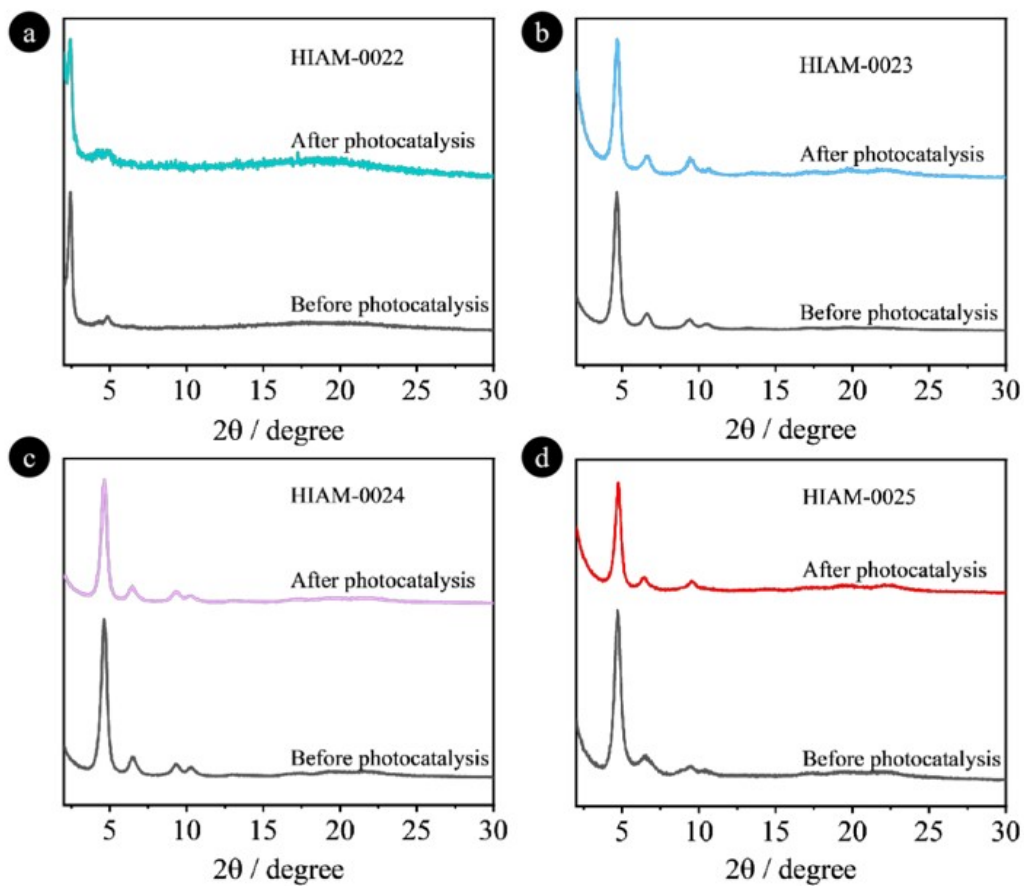

Figure S21. The PXRD patterns of (a) HIAM-0022, (b) HIAM-0023, (c) HIAM-0024 and (d) HIAM-0025 before and after photocatalytic measurement.

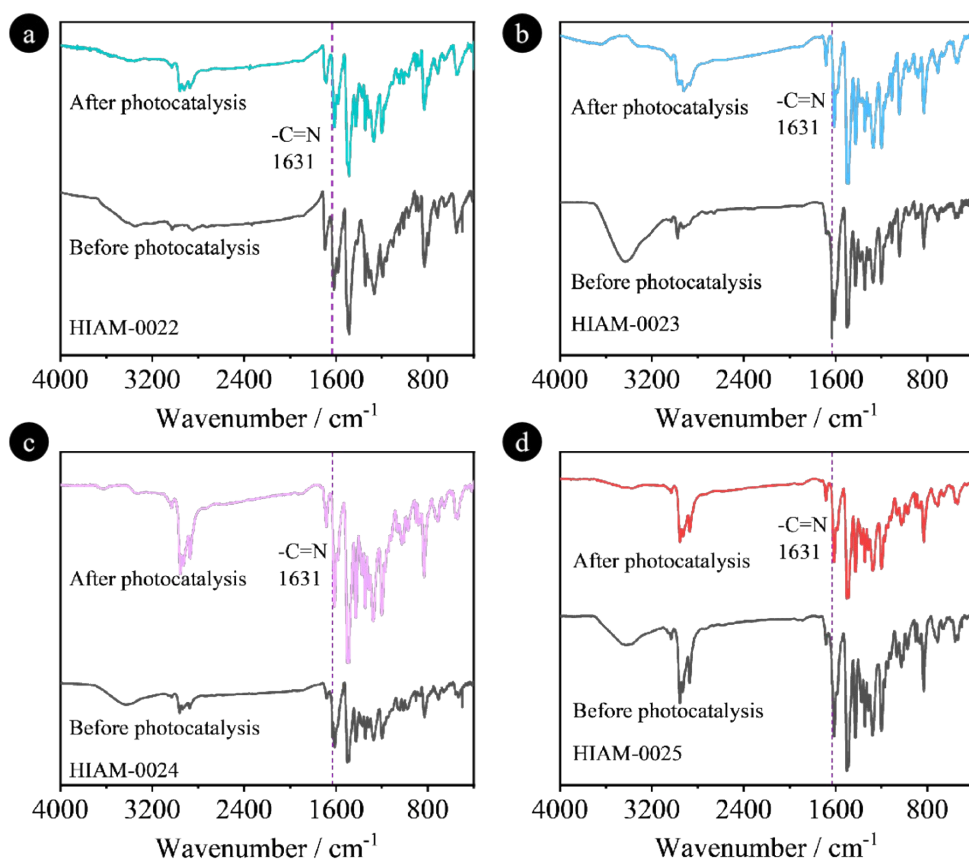

Figure S22. The FT-IR spectra of (a) HIAM-0022, (b) HIAM-0023, (c) HIAM-0024 and (d) HIAM-0025 before and after photocatalytic measurement.

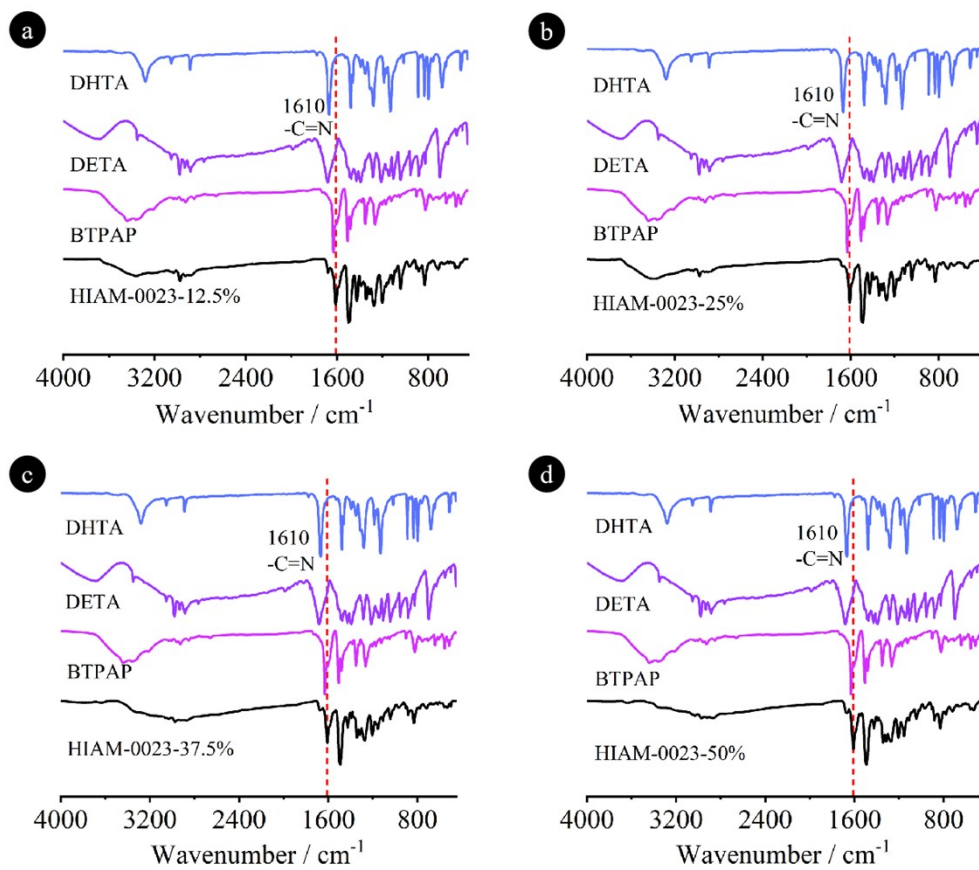

Figure S23. The FT-IR spectra of (a) HIAM-0023-12.5%, (b) HIAM-0023-25%, (c) HIAM-0023-37.5% and (d) HIAM-0023-50% and the corresponding organic building units.

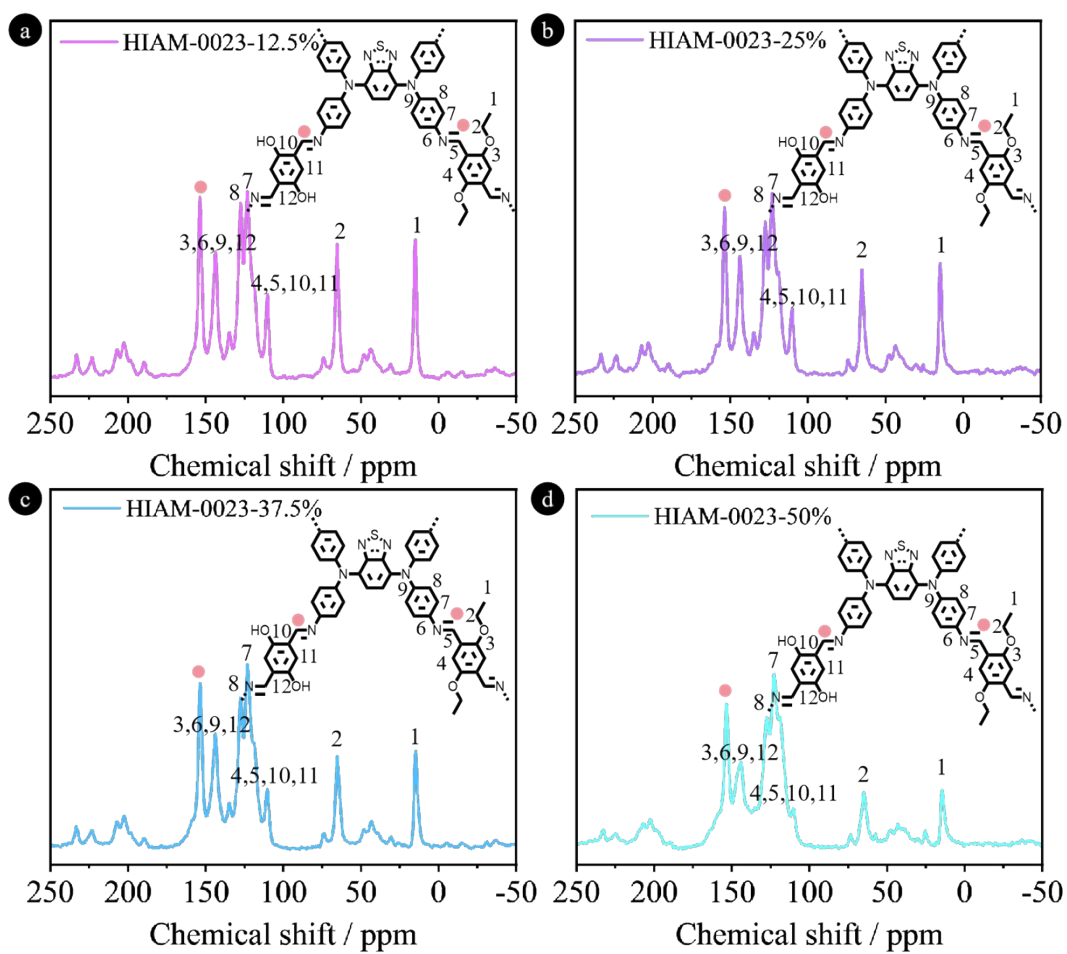

Figure S24. Solid-state  $^{13}\text{C}$  NMR spectra of (a) HIAM-0023-12.5%, (b) HIAM-0023-25%, (c) HIAM-0023-37.5% and (d) HIAM-0023-50%.



Table S1. Summary of synthesis of HIAM-0023-X% series, their stoichiometric linker input ratio and the output ratio observed in their compounds.

| <b>COF</b>      | <b>BTAPA<br/>Stoichiometry /<br/>mmol</b> | <b>DHTA+DETA<br/>Stoichiometry<br/>/ mmol</b> | <b>DHTA:DETA<br/>Stoichiometric<br/>ratio</b> | <b>DHTA:DETA<br/>ratio<br/>observed</b> |
|-----------------|-------------------------------------------|-----------------------------------------------|-----------------------------------------------|-----------------------------------------|
| HIAM-0023-12.5% | 0.04                                      | 0.08                                          | 1:7                                           | 1:6.4                                   |
| HIAM-0023-25%   | 0.04                                      | 0.08                                          | 1:3                                           | 1:2.06                                  |
| HIAM-0023-37.5% | 0.04                                      | 0.08                                          | 1:1.6                                         | 1:1.19                                  |
| HIAM-0023-50%   | 0.04                                      | 0.08                                          | 1:1                                           | 1:0.42                                  |

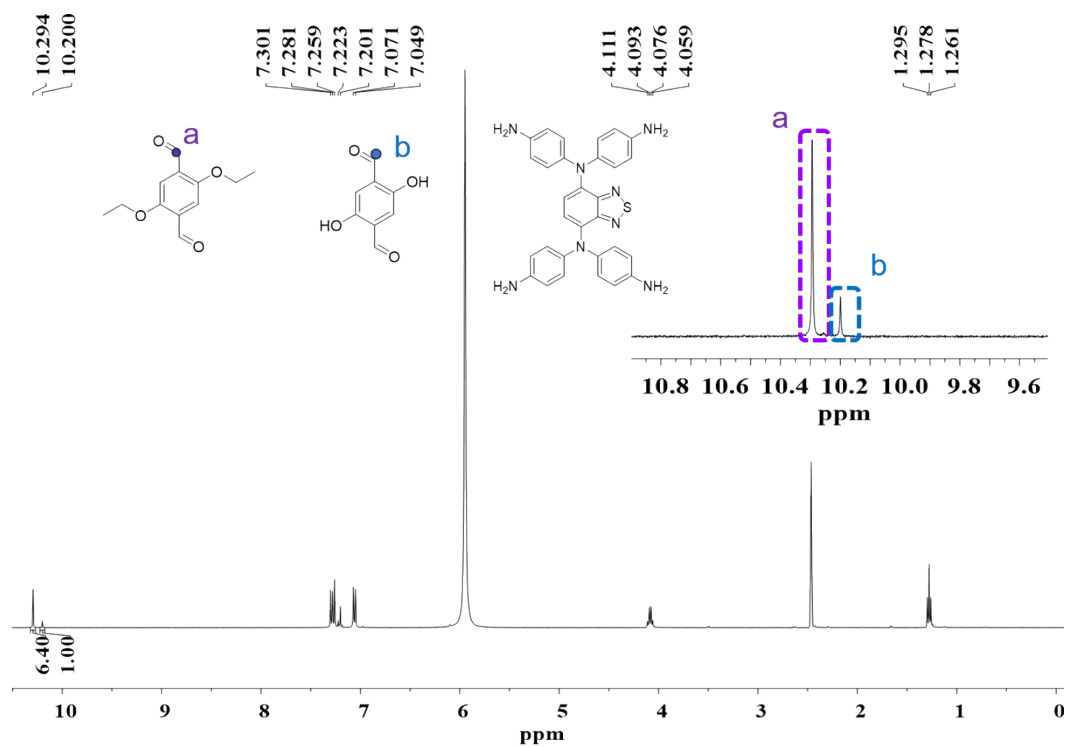

Figure S25. <sup>1</sup>H NMR spectrum of the digested HIAM-0023-12.5%. The peak region between 9.6 to 10.8 ppm has been magnified in the inset.

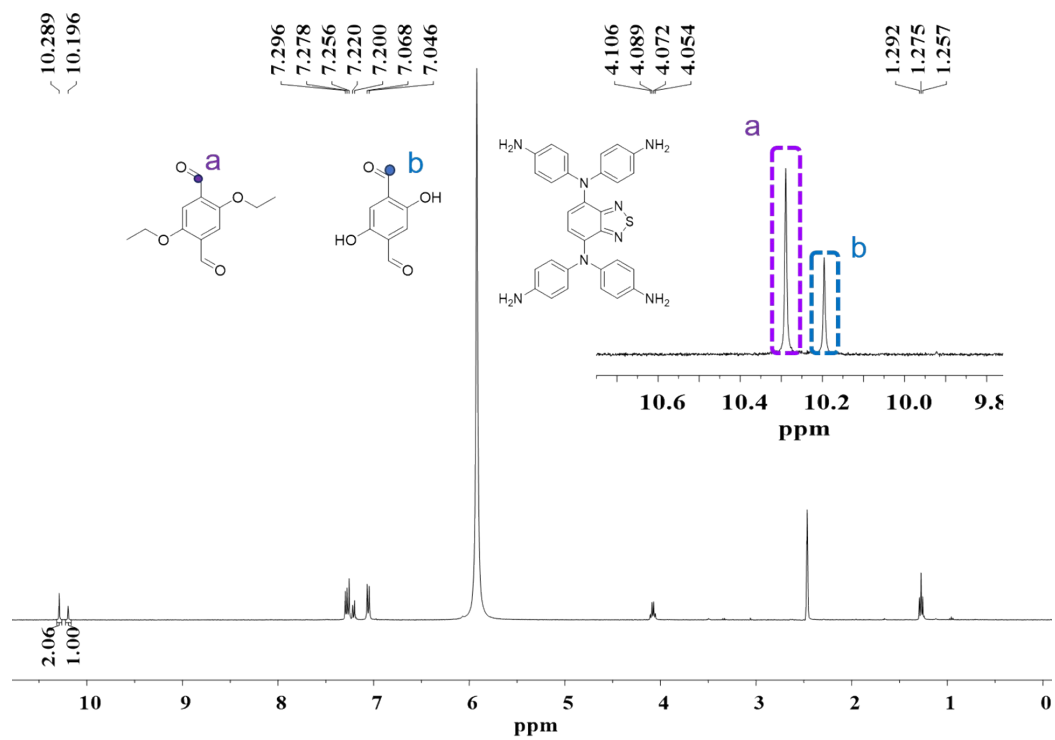

Figure S26. <sup>1</sup>H NMR spectrum of the digested HIAM-0023-25%. The peak region between 9.6 to 10.8 ppm has been magnified in the inset.

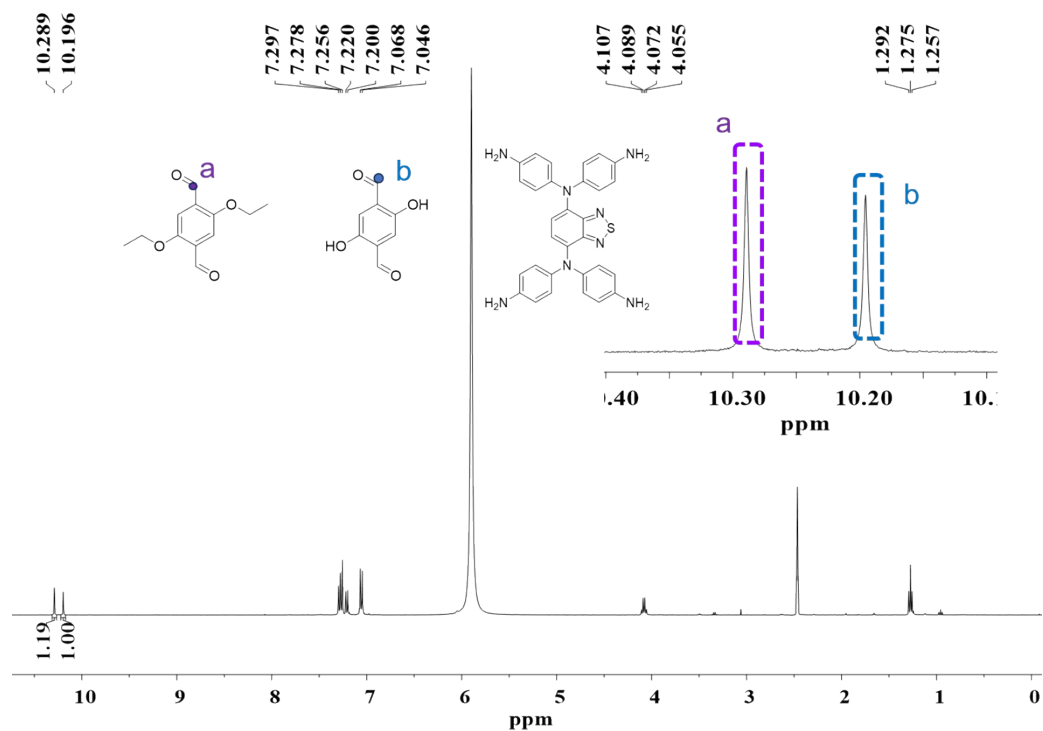

Figure S27.  $^1\text{H}$  NMR spectrum of the digested HIAM-0023-37.5%. The peak region between 9.6 to 10.8 ppm has been magnified in the inset.

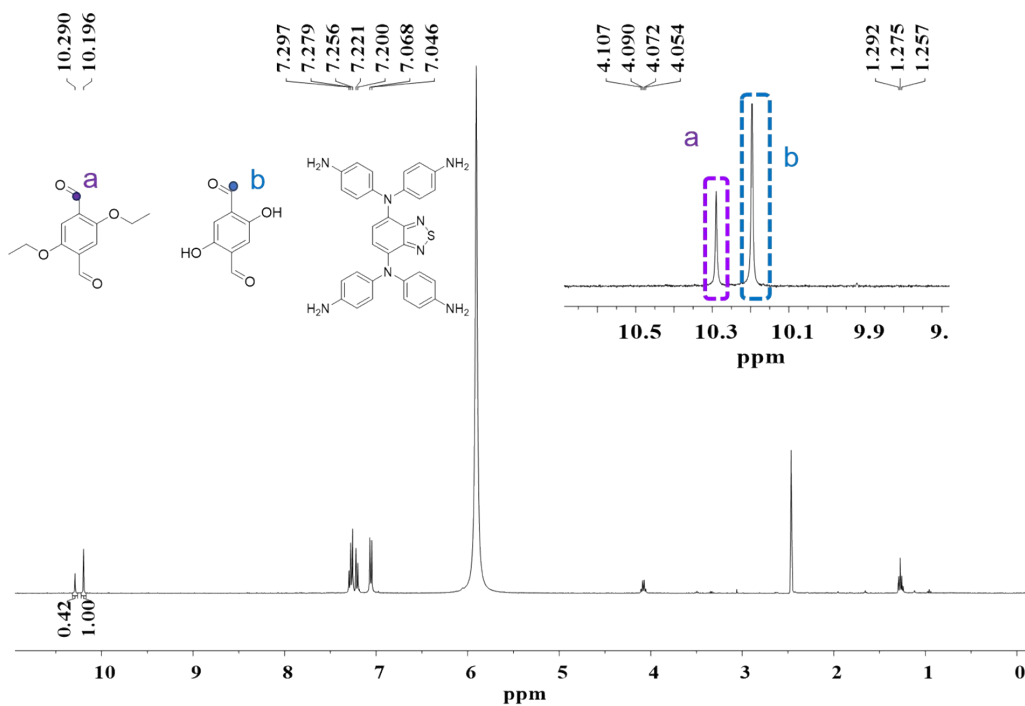

Figure S28.  $^1\text{H}$  NMR spectrum of the digested HIAM-0023-50%. The peak region between 9.6 to 10.8 ppm has been magnified in the inset.

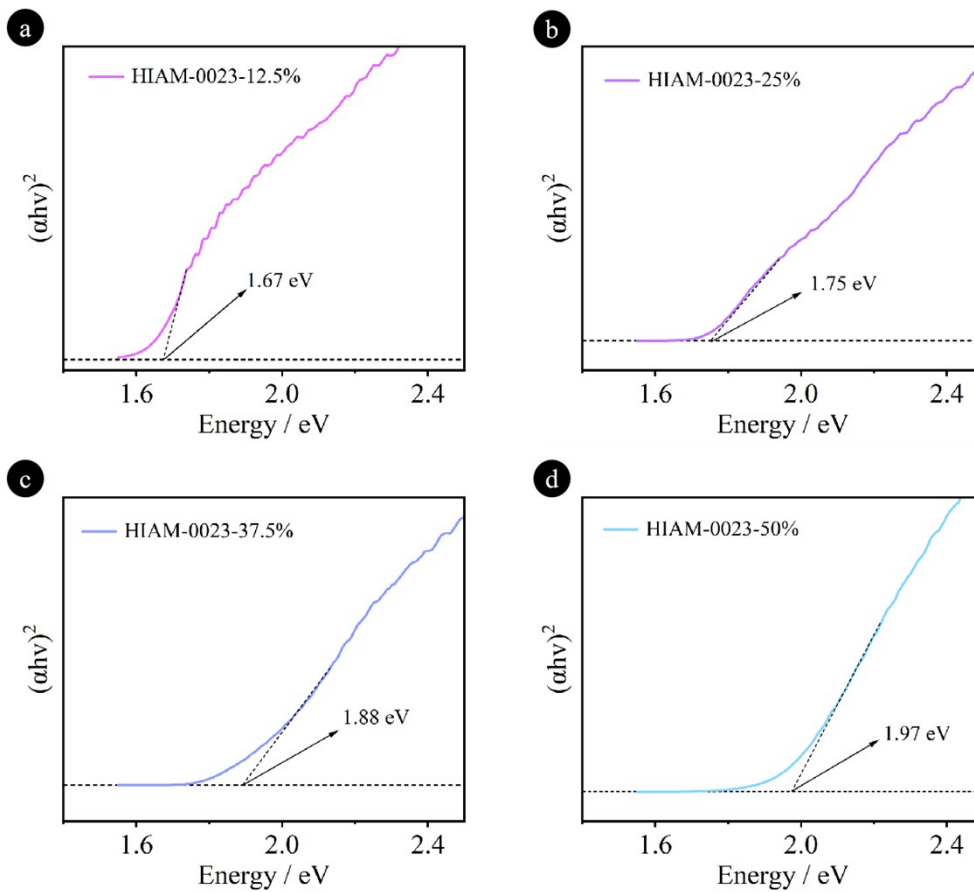

Figure S29. The Tauc plot of (a) HIAM-0023-12.5%, (b) HIAM-0023-25%, (c) HIAM-0023-37.5% and (d) HIAM-0023-50%.

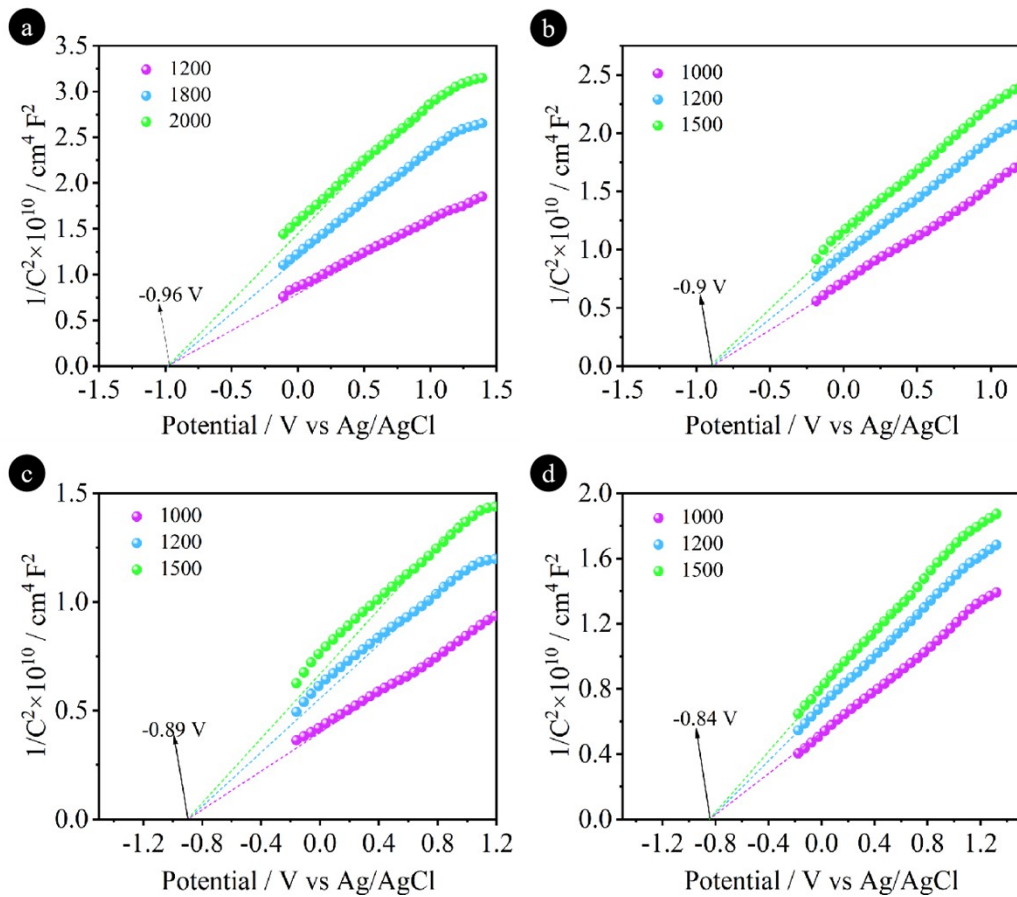

Figure S30. Mott-Schottky plots of (a) HIAM-0023-12.5%, (b) HIAM-0023-25%, (c) HIAM-0023-37.5% and (d) HIAM-0023-50%.

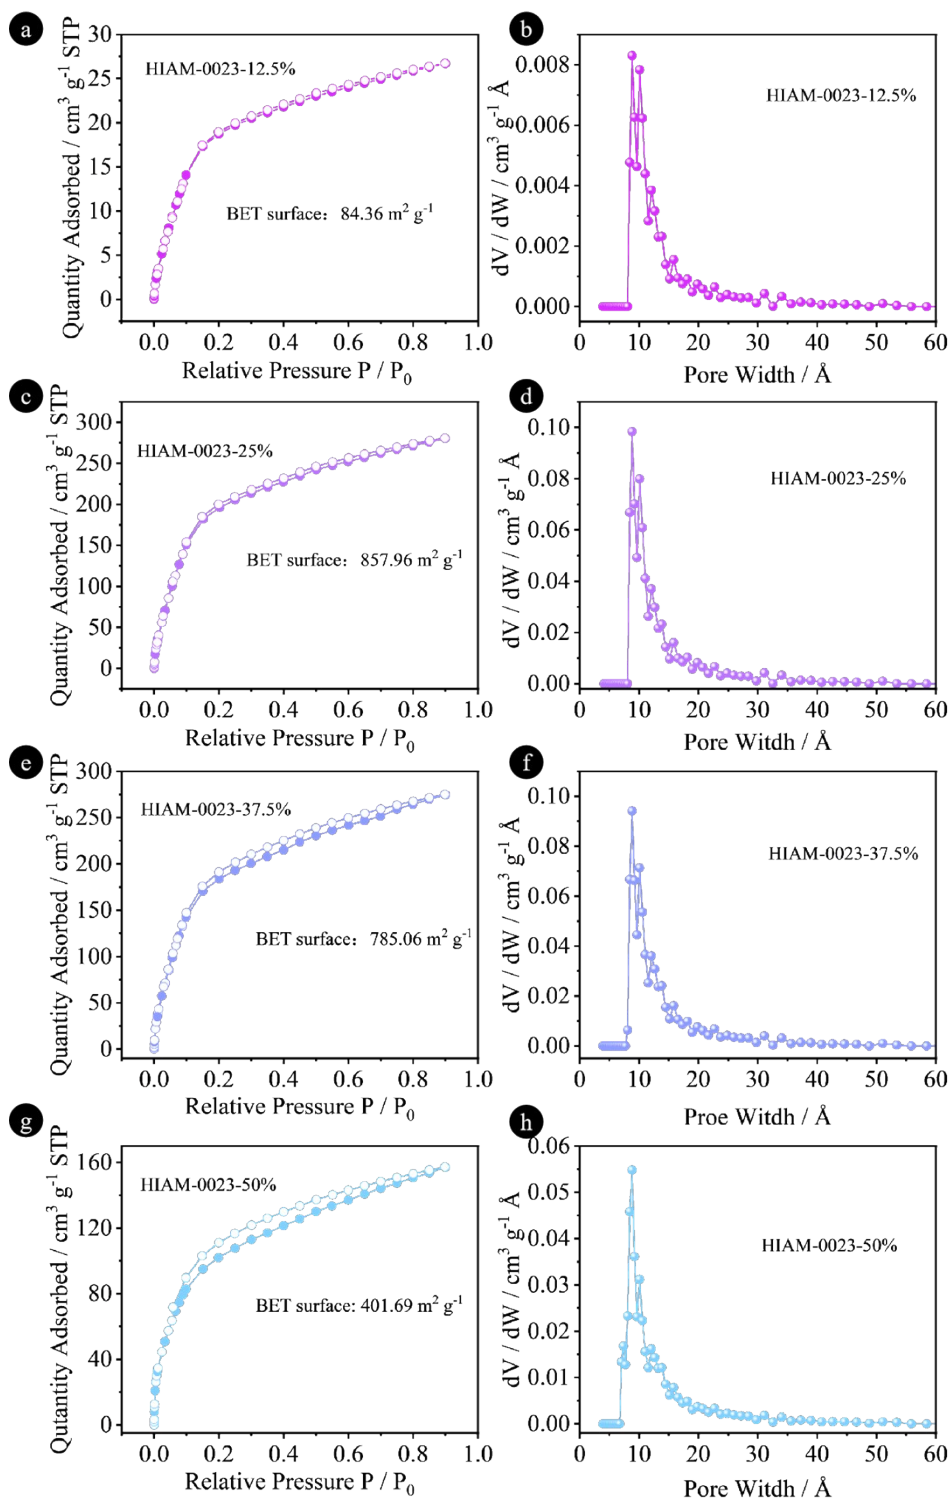

Figure S31. The CO<sub>2</sub> adsorption-desorption isotherms of (a) HIAM-0023-12.5%, (c) HIAM-0023-25%, (e) HIAM-0023-37.5% and (g) HIAM-0023-50%. The calculated pore size distributions of (b) HIAM-0023-12.5%, (d) HIAM-0023-25%, (f) HIAM-0023-37.5% and (h) HIAM-0023-50%.

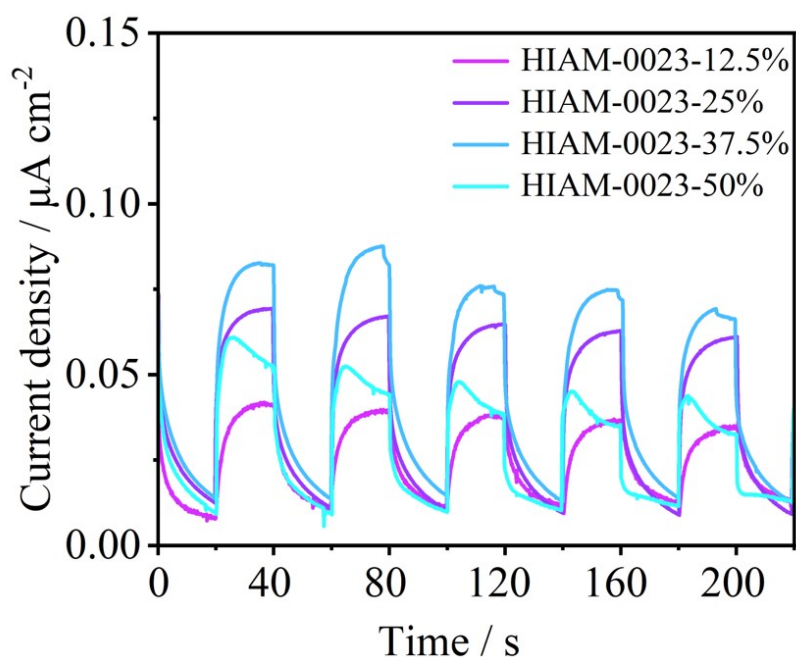

Figure S32. Transient photocurrent of the HIAM-0023-X% (X = 12.5, 25, 37.5 and 50) under  $\lambda > 420$  nm.

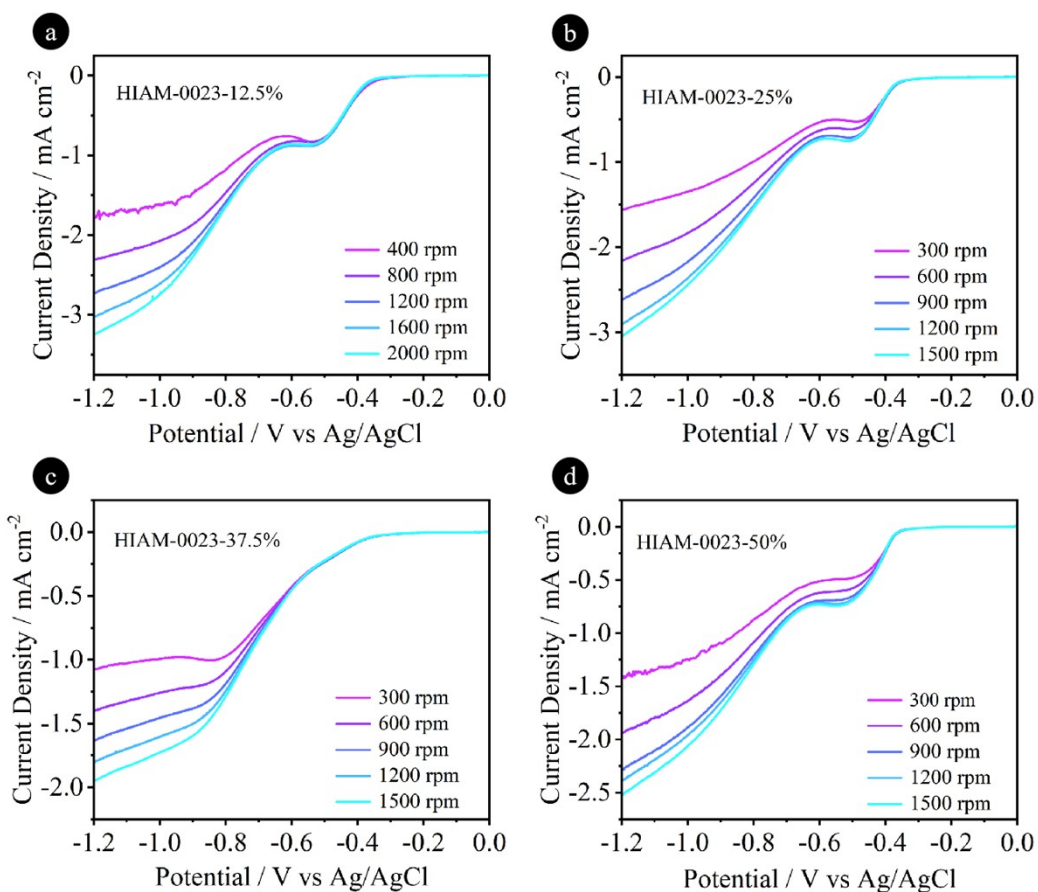

Figure S33. Linear-sweep RDE voltammograms of (a) HIAM-0023-12.5%, (b) HIAM-0023-25%, (c) HIAM-0023-37.5% and (d) HIAM-0023-50% measured at different rotating speeds.

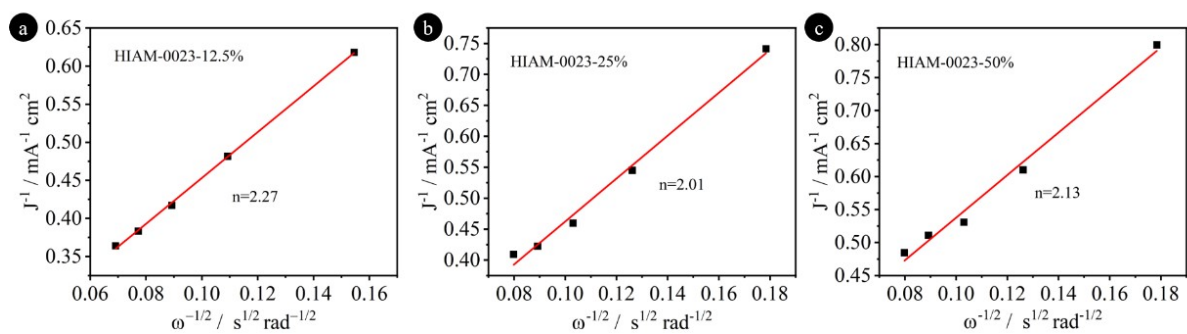

Figure S34. Koutecky-Levich plots obtained by RDE tests in phosphate buffer (pH = 7) solution of (a) HIAM-0023-12.5%, (b) HIAM-0023-25% and (c) HIAM-0023-50%.



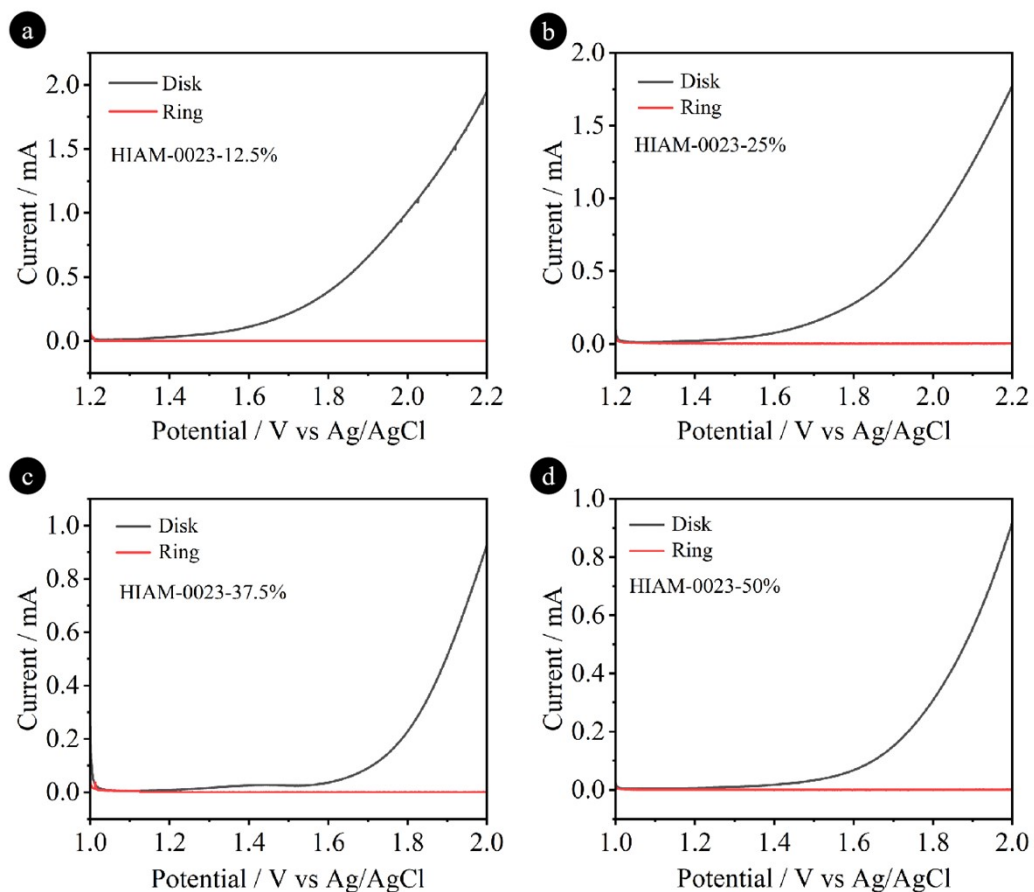

Figure S35. Rotating ring-disk electrode voltammograms of (a) HIAM-0023-12.5%, (b) HIAM-0023-25%, (c) HIAM-0023-37.5% and (d) HIAM-0023-50% obtained in 0.1 M phosphate buffer solution (pH = 7) with a scan rate of  $10 \text{ mV s}^{-1}$  and a rotation rate of 1600 rpm. The potential of Pt ring electrode was set at 0.6 V versus Ag/AgCl to detect  $H_2O_2$ .

Table S2. Unit cell parameters and fractional atomic coordinates for HIAM-0022 based on the AA-stacking.

| Space group          | PM                                                                                     |          |         |
|----------------------|----------------------------------------------------------------------------------------|----------|---------|
| Calculated unit cell | a = c = 43.6752 Å, b = 3.4977 Å<br>$\alpha = \gamma = 90^\circ, \beta = 59.1945^\circ$ |          |         |
| <b>C1</b>            | 0.31982                                                                                | -0.00000 | 0.16436 |
| <b>C2</b>            | 0.35016                                                                                | -0.00000 | 0.16697 |
| <b>C3</b>            | 0.34695                                                                                | -0.00000 | 0.20068 |
| <b>C4</b>            | 0.31329                                                                                | -0.00000 | 0.23183 |
| <b>C5</b>            | 0.28303                                                                                | -0.00000 | 0.22923 |
| <b>C6</b>            | 0.28621                                                                                | -0.00000 | 0.19544 |
| <b>C7</b>            | 0.25469                                                                                | -0.00000 | 0.19238 |
| <b>C8</b>            | 0.37904                                                                                | -0.00000 | 0.20267 |
| <b>C9</b>            | 0.52259                                                                                | -0.00000 | 0.30465 |
| <b>C10</b>           | 0.52234                                                                                | -0.00000 | 0.33696 |
| <b>C11</b>           | 0.49363                                                                                | -0.00000 | 0.37177 |
| <b>C12</b>           | 0.46283                                                                                | -0.00000 | 0.36759 |
| <b>C13</b>           | 0.46308                                                                                | -0.00000 | 0.33448 |
| <b>C14</b>           | 0.49432                                                                                | -0.00000 | 0.29865 |
| <b>N15</b>           | 0.50025                                                                                | -0.00000 | 0.25984 |
| <b>N16</b>           | 0.49864                                                                                | -0.00000 | 0.40495 |
| <b>C17</b>           | 0.54003                                                                                | -0.00000 | 0.22695 |
| <b>C18</b>           | 0.46812                                                                                | -0.00000 | 0.25229 |
| <b>C19</b>           | 0.46612                                                                                | -0.00000 | 0.44537 |
| <b>C20</b>           | 0.53807                                                                                | -0.00000 | 0.39766 |
| <b>C21</b>           | 0.54704                                                                                | -0.00000 | 0.19193 |
| <b>C22</b>           | 0.57807                                                                                | -0.00000 | 0.1593  |
| <b>C23</b>           | 0.6106                                                                                 | -0.00000 | 0.15664 |
| <b>C24</b>           | 0.60927                                                                                | -0.00000 | 0.19066 |

---

|            |         |          |         |
|------------|---------|----------|---------|
| <b>C25</b> | 0.57582 | -0.00000 | 0.22338 |
| <b>C26</b> | 0.43028 | -0.00000 | 0.27831 |
| <b>C27</b> | 0.4014  | -0.00000 | 0.27244 |
| <b>C28</b> | 0.40693 | -0.00000 | 0.23868 |
| <b>C29</b> | 0.44136 | -0.00000 | 0.2111  |
| <b>C30</b> | 0.46952 | -0.00000 | 0.21777 |
| <b>C31</b> | 0.5744  | -0.00000 | 0.3651  |
| <b>C32</b> | 0.60719 | -0.00000 | 0.36503 |
| <b>C33</b> | 0.60712 | -0.00000 | 0.39684 |
| <b>C34</b> | 0.57455 | -0.00000 | 0.42731 |
| <b>C35</b> | 0.54413 | -0.00000 | 0.42589 |
| <b>C36</b> | 0.46726 | -0.00000 | 0.47858 |
| <b>C37</b> | 0.43926 | -0.00000 | 0.51413 |
| <b>C38</b> | 0.40505 | -0.00000 | 0.52181 |
| <b>C39</b> | 0.39938 | -0.00000 | 0.49376 |
| <b>C40</b> | 0.42824 | -0.00000 | 0.45811 |
| <b>N41</b> | 0.3772  | -0.00000 | 0.23341 |
| <b>C42</b> | 0.70461 | -0.00000 | 0.40021 |
| <b>C43</b> | 0.73418 | -0.00000 | 0.40392 |
| <b>C44</b> | 0.73016 | -0.00000 | 0.43828 |
| <b>C45</b> | 0.69636 | -0.00000 | 0.46875 |
| <b>C46</b> | 0.66674 | -0.00000 | 0.465   |
| <b>C47</b> | 0.67086 | -0.00000 | 0.43075 |
| <b>C48</b> | 0.63911 | -0.00000 | 0.4284  |
| <b>C49</b> | 0.7614  | -0.00000 | 0.44185 |
| <b>N50</b> | 0.63933 | -0.00000 | 0.39827 |
| <b>N51</b> | 0.6419  | -0.00000 | 0.12453 |
| <b>C52</b> | 0.64327 | -0.00000 | 0.09254 |
| <b>C53</b> | 0.76552 | -0.00000 | 0.95263 |

---

---

|            |         |          |         |
|------------|---------|----------|---------|
| <b>C54</b> | 0.73527 | -0.00000 | 0.989   |
| <b>C55</b> | 0.7396  | -0.00000 | 0.01896 |
| <b>C56</b> | 0.70975 | -0.00000 | 0.05342 |
| <b>C57</b> | 0.67576 | -0.00000 | 0.05775 |
| <b>C58</b> | 0.67178 | -0.00000 | 0.02772 |
| <b>C59</b> | 0.70129 | -0.00000 | 0.99364 |
| <b>C60</b> | 0.31227 | -0.00000 | 0.62275 |
| <b>C61</b> | 0.2813  | -0.00000 | 0.65534 |
| <b>C62</b> | 0.28229 | -0.00000 | 0.68718 |
| <b>C63</b> | 0.31496 | -0.00000 | 0.68578 |
| <b>C64</b> | 0.34643 | -0.00000 | 0.65261 |
| <b>C65</b> | 0.34496 | -0.00000 | 0.62114 |
| <b>C66</b> | 0.3774  | -0.00000 | 0.58663 |
| <b>N67</b> | 0.37567 | -0.00000 | 0.55766 |
| <b>C68</b> | 0.03892 | -0.00000 | 0.77778 |
| <b>C69</b> | 0.00858 | -0.00000 | 0.77289 |
| <b>C70</b> | 0.97161 | -0.00000 | 0.79908 |
| <b>C71</b> | 0.97471 | -0.00000 | 0.82832 |
| <b>C72</b> | 0.00204 | -0.00000 | 0.83621 |
| <b>C73</b> | 0.03769 | -0.00000 | 0.81191 |
| <b>N74</b> | 0.0653  | -0.00000 | 0.82496 |
| <b>N75</b> | 0.93172 | -0.00000 | 0.80565 |
| <b>C76</b> | 0.10674 | -0.00000 | 0.79854 |
| <b>C77</b> | 0.05068 | -0.00000 | 0.86643 |
| <b>C78</b> | 0.8976  | -0.00000 | 0.84394 |
| <b>C79</b> | 0.92587 | -0.00000 | 0.77339 |
| <b>C80</b> | 0.1357  | -0.00000 | 0.80641 |
| <b>C81</b> | 0.1725  | -0.00000 | 0.78167 |
| <b>C82</b> | 0.18427 | -0.00000 | 0.7461  |

---

---

|             |         |          |         |
|-------------|---------|----------|---------|
| <b>C83</b>  | 0.16012 | -0.00000 | 0.73551 |
| <b>C84</b>  | 0.12394 | -0.00000 | 0.76054 |
| <b>C85</b>  | 0.0137  | -0.00000 | 0.89787 |
| <b>C86</b>  | 0.0037  | -0.00000 | 0.93385 |
| <b>C87</b>  | 0.02955 | -0.00000 | 0.94202 |
| <b>C88</b>  | 0.06411 | -0.00000 | 0.91602 |
| <b>C89</b>  | 0.07334 | -0.00000 | 0.88078 |
| <b>C90</b>  | 0.95568 | -0.00000 | 0.74177 |
| <b>C91</b>  | 0.96247 | -0.00000 | 0.70817 |
| <b>C92</b>  | 0.93474 | -0.00000 | 0.70226 |
| <b>C93</b>  | 0.90051 | -0.00000 | 0.73207 |
| <b>C94</b>  | 0.89573 | -0.00000 | 0.76702 |
| <b>C95</b>  | 0.86288 | -0.00000 | 0.84885 |
| <b>C96</b>  | 0.83045 | -0.00000 | 0.88096 |
| <b>C97</b>  | 0.82951 | -0.00000 | 0.91307 |
| <b>C98</b>  | 0.86103 | -0.00000 | 0.91231 |
| <b>C99</b>  | 0.89341 | -0.00000 | 0.87983 |
| <b>N100</b> | 0.22045 | -0.00000 | 0.71908 |
| <b>N101</b> | 0.94128 | -0.00000 | 0.66673 |
| <b>C102</b> | 0.03902 | -0.00000 | 0.02645 |
| <b>C103</b> | 0.04811 | -0.00000 | 0.05192 |
| <b>C104</b> | 0.02137 | -0.00000 | 0.08745 |
| <b>C105</b> | 0.98733 | -0.00000 | 0.09336 |
| <b>C106</b> | 0.97795 | -0.00000 | 0.06736 |
| <b>C107</b> | 0.00276 | -0.00000 | 0.03597 |
| <b>C108</b> | 0.99712 | -0.00000 | 0.00317 |
| <b>C109</b> | 0.03108 | -0.00000 | 0.11401 |
| <b>N110</b> | 0.0231  | -0.00000 | 0.97661 |
| <b>N111</b> | 0.79749 | -0.00000 | 0.9471  |

---

---

|             |         |          |         |
|-------------|---------|----------|---------|
| <b>C112</b> | 0.97728 | -0.00000 | 0.30566 |
| <b>C113</b> | 0.0072  | -0.00000 | 0.27299 |
| <b>C114</b> | 0.04593 | -0.00000 | 0.2636  |
| <b>C115</b> | 0.04261 | -0.00000 | 0.29664 |
| <b>C116</b> | 0.01232 | -0.00000 | 0.33132 |
| <b>C117</b> | 0.97559 | -0.00000 | 0.33906 |
| <b>N118</b> | 0.94247 | -0.00000 | 0.37838 |
| <b>N119</b> | 0.08522 | -0.00000 | 0.22792 |
| <b>C120</b> | 0.90223 | -0.00000 | 0.38812 |
| <b>C121</b> | 0.95016 | -0.00000 | 0.40947 |
| <b>C122</b> | 0.12015 | -0.00000 | 0.229   |
| <b>C123</b> | 0.08954 | -0.00000 | 0.19002 |
| <b>C124</b> | 0.87039 | -0.00000 | 0.42381 |
| <b>C125</b> | 0.83448 | -0.00000 | 0.43301 |
| <b>C126</b> | 0.82639 | -0.00000 | 0.4067  |
| <b>C127</b> | 0.85308 | -0.00000 | 0.37242 |
| <b>C128</b> | 0.88843 | -0.00000 | 0.3641  |
| <b>C129</b> | 0.98462 | -0.00000 | 0.40665 |
| <b>C130</b> | 0.99148 | -0.00000 | 0.43448 |
| <b>C131</b> | 0.96373 | -0.00000 | 0.46866 |
| <b>C132</b> | 0.93005 | -0.00000 | 0.47514 |
| <b>C133</b> | 0.92396 | -0.00000 | 0.44695 |
| <b>C134</b> | 0.05904 | -0.00000 | 0.19112 |
| <b>C135</b> | 0.04919 | -0.00000 | 0.16693 |
| <b>C136</b> | 0.07466 | -0.00000 | 0.13177 |
| <b>C137</b> | 0.11009 | -0.00000 | 0.12336 |
| <b>C138</b> | 0.11784 | -0.00000 | 0.15162 |
| <b>C139</b> | 0.15364 | -0.00000 | 0.19692 |
| <b>C140</b> | 0.18698 | -0.00000 | 0.19324 |

---

---

|             |         |          |         |
|-------------|---------|----------|---------|
| <b>C141</b> | 0.19018 | -0.00000 | 0.22301 |
| <b>C142</b> | 0.15974 | -0.00000 | 0.25595 |
| <b>C143</b> | 0.12615 | -0.00000 | 0.25925 |
| <b>N144</b> | 0.7916  | -0.00000 | 0.4125  |
| <b>N145</b> | 0.2236  | -0.00000 | 0.22118 |
| <b>N146</b> | 0.0644  | -0.00000 | 0.10557 |
| <b>C147</b> | 0.95013 | -0.00000 | 0.59859 |
| <b>C148</b> | 0.95608 | -0.00000 | 0.56461 |
| <b>C149</b> | 0.99122 | -0.00000 | 0.53504 |
| <b>C150</b> | 0.01815 | -0.00000 | 0.5442  |
| <b>C151</b> | 0.01207 | -0.00000 | 0.57865 |
| <b>C152</b> | 0.97914 | -0.00000 | 0.60344 |
| <b>C153</b> | 0.97329 | -0.00000 | 0.63873 |
| <b>C154</b> | 0.99655 | -0.00000 | 0.49967 |
| <b>N155</b> | 0.96791 | -0.00000 | 0.49833 |
| <b>C156</b> | 0.24882 | -0.00000 | 0.72115 |
| <b>N157</b> | 0.42974 | -0.00000 | 0.39405 |
| <b>S158</b> | 0.39766 | -0.00000 | 0.38441 |
| <b>N159</b> | 0.43002 | -0.00000 | 0.34188 |
| <b>N160</b> | 0.02248 | -0.00000 | 0.73687 |
| <b>S161</b> | 0.06606 | -0.00000 | 0.70956 |
| <b>N162</b> | 0.06832 | -0.00000 | 0.74625 |
| <b>N163</b> | 0.94881 | -0.00000 | 0.30358 |
| <b>S164</b> | 0.94997 | -0.00000 | 0.26504 |
| <b>N165</b> | 0.99345 | -0.00000 | 0.24656 |
| <b>H166</b> | 0.32257 | -0.00000 | 0.13816 |
| <b>H167</b> | 0.37611 | -0.00000 | 0.1427  |
| <b>H168</b> | 0.31031 | -0.00000 | 0.25812 |
| <b>H169</b> | 0.25723 | -0.00000 | 0.25366 |

---

---

|             |         |          |         |
|-------------|---------|----------|---------|
| <b>H170</b> | 0.25817 | -0.00000 | 0.16599 |
| <b>H171</b> | 0.40385 | -0.00000 | 0.17754 |
| <b>H172</b> | 0.54715 | -0.00000 | 0.28517 |
| <b>H173</b> | 0.54683 | -0.00000 | 0.33165 |
| <b>H174</b> | 0.53008 | -0.00000 | 0.18518 |
| <b>H175</b> | 0.57476 | -0.00000 | 0.13639 |
| <b>H176</b> | 0.63437 | -0.00000 | 0.19027 |
| <b>H177</b> | 0.58632 | -0.00000 | 0.24056 |
| <b>H178</b> | 0.41547 | -0.00000 | 0.30487 |
| <b>H179</b> | 0.37389 | -0.00000 | 0.29465 |
| <b>H180</b> | 0.44641 | -0.00000 | 0.18384 |
| <b>H181</b> | 0.48727 | -0.00000 | 0.19008 |
| <b>H182</b> | 0.5855  | -0.00000 | 0.33701 |
| <b>H183</b> | 0.63273 | -0.00000 | 0.34011 |
| <b>H184</b> | 0.57082 | -0.00000 | 0.4538  |
| <b>H185</b> | 0.52715 | -0.00000 | 0.44973 |
| <b>H186</b> | 0.48446 | -0.00000 | 0.48873 |
| <b>H187</b> | 0.44399 | -0.00000 | 0.53646 |
| <b>H188</b> | 0.37187 | -0.00000 | 0.49986 |
| <b>H189</b> | 0.41341 | -0.00000 | 0.44662 |
| <b>H190</b> | 0.70814 | -0.00000 | 0.37369 |
| <b>H191</b> | 0.76016 | -0.00000 | 0.37973 |
| <b>H192</b> | 0.69291 | -0.00000 | 0.49524 |
| <b>H193</b> | 0.64053 | -0.00000 | 0.48893 |
| <b>H194</b> | 0.61529 | -0.00000 | 0.45411 |
| <b>H195</b> | 0.75911 | -0.00000 | 0.46781 |
| <b>H196</b> | 0.61985 | -0.00000 | 0.09054 |
| <b>H197</b> | 0.76034 | -0.00000 | 0.9309  |
| <b>H198</b> | 0.76587 | -0.00000 | 0.01576 |

---



---

|             |         |          |         |
|-------------|---------|----------|---------|
| <b>H199</b> | 0.71318 | -0.00000 | 0.07636 |
| <b>H200</b> | 0.64564 | -0.00000 | 0.03055 |
| <b>H201</b> | 0.69753 | -0.00000 | 0.97088 |
| <b>H202</b> | 0.31042 | -0.00000 | 0.59886 |
| <b>H203</b> | 0.25655 | -0.00000 | 0.65526 |
| <b>H204</b> | 0.31607 | -0.00000 | 0.71009 |
| <b>H205</b> | 0.37179 | -0.00000 | 0.65148 |
| <b>H206</b> | 0.40199 | -0.00000 | 0.58669 |
| <b>H207</b> | 0.99582 | -0.00000 | 0.85612 |
| <b>H208</b> | 0.13998 | -0.00000 | 0.82773 |
| <b>H209</b> | 0.19218 | -0.00000 | 0.79001 |
| <b>H210</b> | 0.16985 | -0.00000 | 0.70688 |
| <b>H211</b> | 0.11526 | -0.00000 | 0.74393 |
| <b>H212</b> | 0.98863 | -0.00000 | 0.90054 |
| <b>H213</b> | 0.97815 | -0.00000 | 0.95134 |
| <b>H214</b> | 0.08442 | -0.00000 | 0.92353 |
| <b>H215</b> | 0.09909 | -0.00000 | 0.86967 |
| <b>H216</b> | 0.97464 | -0.00000 | 0.74381 |
| <b>H217</b> | 0.99034 | -0.00000 | 0.68813 |
| <b>H218</b> | 0.8778  | -0.00000 | 0.7283  |
| <b>H219</b> | 0.8676  | -0.00000 | 0.78318 |
| <b>H220</b> | 0.85707 | -0.00000 | 0.82971 |
| <b>H221</b> | 0.80634 | -0.00000 | 0.87977 |
| <b>H222</b> | 0.86011 | -0.00000 | 0.93783 |
| <b>H223</b> | 0.90989 | -0.00000 | 0.8913  |
| <b>H224</b> | 0.06109 | -0.00000 | 0.99905 |
| <b>H225</b> | 0.07613 | -0.00000 | 0.04362 |
| <b>H226</b> | 0.96652 | -0.00000 | 0.12132 |
| <b>H227</b> | 0.95014 | -0.00000 | 0.07496 |

---

---

|             |         |          |         |
|-------------|---------|----------|---------|
| <b>H228</b> | 0.97045 | -0.00000 | 0.00739 |
| <b>H229</b> | 0.00867 | -0.00000 | 0.14073 |
| <b>H230</b> | 0.06473 | -0.00000 | 0.29685 |
| <b>H231</b> | 0.02423 | -0.00000 | 0.34551 |
| <b>H232</b> | 0.86419 | -0.00000 | 0.44966 |
| <b>H233</b> | 0.81281 | -0.00000 | 0.46081 |
| <b>H234</b> | 0.84513 | -0.00000 | 0.35218 |
| <b>H235</b> | 0.89602 | -0.00000 | 0.33776 |
| <b>H236</b> | 0.00845 | -0.00000 | 0.39203 |
| <b>H237</b> | 0.01643 | -0.00000 | 0.43378 |
| <b>H238</b> | 0.90816 | -0.00000 | 0.50293 |
| <b>H239</b> | 0.89746 | -0.00000 | 0.4618  |
| <b>H240</b> | 0.04214 | -0.00000 | 0.21304 |
| <b>H241</b> | 0.02085 | -0.00000 | 0.17813 |
| <b>H242</b> | 0.14616 | -0.00000 | 0.13723 |
| <b>H243</b> | 0.15754 | -0.00000 | 0.17252 |
| <b>H244</b> | 0.20998 | -0.00000 | 0.16648 |
| <b>H245</b> | 0.16235 | -0.00000 | 0.27952 |
| <b>H246</b> | 0.11033 | -0.00000 | 0.28753 |
| <b>H247</b> | 0.92291 | -0.00000 | 0.6209  |
| <b>H248</b> | 0.93283 | -0.00000 | 0.56181 |
| <b>H249</b> | 0.04519 | -0.00000 | 0.52157 |
| <b>H250</b> | 0.03465 | -0.00000 | 0.58257 |
| <b>H251</b> | 0.99726 | -0.00000 | 0.63977 |
| <b>H252</b> | 0.02078 | -0.00000 | 0.48057 |
| <b>H253</b> | 0.2481  | -0.00000 | 0.74635 |
| <b>H254</b> | 0.13133 | -0.00000 | 0.09553 |
| <b>H255</b> | 0.95351 | -0.00000 | 0.85112 |

---

Table S3. Unit cell parameters and fractional atomic coordinates for HIAM-0023 based on the AA-stacking.

| Space group          | CM                                                  |         |          |
|----------------------|-----------------------------------------------------|---------|----------|
| Calculated unit cell | a = 32.2745 Å, b = 29.3605 Å, c = 4.7628            |         |          |
|                      | $\alpha = \gamma = 90^\circ, \beta = 91.0557^\circ$ |         |          |
| <b>C1</b>            | 0.1214                                              | 0.52287 | -0.03394 |
| <b>C3</b>            | 0.15553                                             | 0.45344 | 0.07831  |
| <b>C4</b>            | 0.1895                                              | 0.47782 | 0.18332  |
| <b>N7</b>            | 0.15585                                             | 0.59385 | 0.07689  |
| <b>C9</b>            | 0.1171                                              | 0.61822 | 0.07414  |
| <b>C10</b>           | 0.19486                                             | 0.61774 | 0.05335  |
| <b>C13</b>           | 0.11216                                             | 0.65322 | -0.10939 |
| <b>C14</b>           | 0.07548                                             | 0.67773 | -0.10999 |
| <b>C15</b>           | 0.04243                                             | 0.66876 | 0.07831  |
| <b>C16</b>           | 0.04575                                             | 0.63332 | 0.26195  |
| <b>C17</b>           | 0.08203                                             | 0.60774 | 0.26651  |
| <b>C18</b>           | 0.22517                                             | 0.60526 | -0.14289 |
| <b>C19</b>           | 0.26383                                             | 0.6264  | -0.15853 |
| <b>C20</b>           | 0.27279                                             | 0.6615  | 0.02254  |
| <b>C21</b>           | 0.24167                                             | 0.67518 | 0.21098  |
| <b>C22</b>           | 0.20304                                             | 0.65371 | 0.22545  |
| <b>N33</b>           | 0.31055                                             | 0.31772 | 0.02713  |
| <b>C35</b>           | -0.11263                                            | 0.7677  | 0.09239  |
| <b>C36</b>           | -0.07484                                            | 0.74416 | 0.12574  |
| <b>C37</b>           | -0.0395                                             | 0.75639 | -0.03435 |
| <b>C38</b>           | -0.04228                                            | 0.79143 | -0.22133 |
| <b>C39</b>           | -0.08                                               | 0.81467 | -0.25649 |
| <b>C40</b>           | -0.11548                                            | 0.80235 | -0.09895 |
| <b>C41</b>           | -0.15539                                            | 0.82645 | -0.13473 |

|             |          |         |          |
|-------------|----------|---------|----------|
| <b>C42</b>  | 0.00124  | 0.7334  | -0.01789 |
| <b>N43</b>  | 0.00448  | 0.69412 | 0.07965  |
| <b>O53</b>  | -0.07059 | 0.29078 | 0.3154   |
| <b>O54</b>  | -0.08399 | 0.14997 | -0.44378 |
| <b>C57</b>  | -0.04729 | 0.13329 | -0.57813 |
| <b>C58</b>  | -0.10714 | 0.30718 | 0.45296  |
| <b>C59</b>  | -0.0593  | 0.09429 | -0.75632 |
| <b>C60</b>  | -0.09493 | 0.34618 | 0.63048  |
| <b>N65</b>  | 0.22513  | 0.46123 | 0.288    |
| <b>H68</b>  | 0.09489  | 0.53956 | -0.1261  |
| <b>H70</b>  | 0.13676  | 0.66148 | -0.25552 |
| <b>H71</b>  | 0.07303  | 0.70333 | -0.26422 |
| <b>H72</b>  | 0.02028  | 0.62593 | 0.40484  |
| <b>H73</b>  | 0.08459  | 0.58101 | 0.41263  |
| <b>H74</b>  | 0.21895  | 0.57812 | -0.27732 |
| <b>H75</b>  | 0.28599  | 0.61446 | -0.31143 |
| <b>H76</b>  | 0.24765  | 0.70215 | 0.35132  |
| <b>H77</b>  | 0.17985  | 0.66464 | 0.3745   |
| <b>H86</b>  | -0.14012 | 0.75928 | 0.21355  |
| <b>H87</b>  | -0.01468 | 0.79992 | -0.34176 |
| <b>H88</b>  | -0.15641 | 0.85181 | -0.2904  |
| <b>H89</b>  | 0.02851  | 0.75    | -0.10009 |
| <b>H94</b>  | -0.02394 | 0.12283 | -0.4181  |
| <b>H95</b>  | -0.03329 | 0.15825 | -0.71759 |
| <b>H96</b>  | -0.12077 | 0.28204 | 0.59282  |
| <b>H97</b>  | -0.13086 | 0.31756 | 0.29513  |
| <b>H98</b>  | -0.03116 | 0.08179 | -0.8679  |
| <b>H99</b>  | -0.08335 | 0.1037  | -0.914   |
| <b>H100</b> | -0.07227 | 0.06819 | -0.62065 |

---

|             |          |         |         |
|-------------|----------|---------|---------|
| <b>H101</b> | -0.08264 | 0.37241 | 0.49329 |
| <b>H102</b> | -0.07023 | 0.33694 | 0.78381 |
| <b>H103</b> | -0.1228  | 0.35835 | 0.74647 |
| <b>S66</b>  | 0.25935  | 0.5     | 0.38993 |

---

Table S4. Unit cell parameters and fractional atomic coordinates for HIAM-0024 based on the AA-stacking.

| Space group          | CM                                                                                              |         |          |
|----------------------|-------------------------------------------------------------------------------------------------|---------|----------|
| Calculated unit cell | a = 30.7571 Å, b = 32.7385 Å, c = 4.6603<br>$\alpha = \gamma = 90^\circ, \beta = 90.1773^\circ$ |         |          |
| <b>C1</b>            | 0.11489                                                                                         | 0.52189 | 0.111    |
| <b>C2</b>            | 0.14645                                                                                         | 0.45537 | -0.03928 |
| <b>C3</b>            | 0.17798                                                                                         | 0.47868 | -0.18282 |
| <b>N4</b>            | 0.14583                                                                                         | 0.58995 | -0.04343 |
| <b>C5</b>            | 0.10527                                                                                         | 0.61165 | -0.02148 |
| <b>C6</b>            | 0.18503                                                                                         | 0.61458 | -0.04135 |
| <b>C7</b>            | 0.10075                                                                                         | 0.64449 | 0.17291  |
| <b>C8</b>            | 0.06279                                                                                         | 0.6671  | 0.18952  |
| <b>C9</b>            | 0.02822                                                                                         | 0.65769 | 0.00723  |
| <b>C10</b>           | 0.03191                                                                                         | 0.62377 | -0.17986 |
| <b>C11</b>           | 0.07017                                                                                         | 0.60095 | -0.19503 |
| <b>C12</b>           | 0.22156                                                                                         | 0.60109 | 0.10722  |
| <b>C13</b>           | 0.2585                                                                                          | 0.62554 | 0.12056  |
| <b>C14</b>           | 0.25964                                                                                         | 0.6647  | -0.0134  |
| <b>C15</b>           | 0.22369                                                                                         | 0.67813 | -0.16607 |
| <b>C16</b>           | 0.18663                                                                                         | 0.65371 | -0.17634 |
| <b>N17</b>           | 0.29707                                                                                         | 0.30921 | -0.00631 |
| <b>C18</b>           | 0.36939                                                                                         | 0.25219 | -0.02321 |
| <b>C19</b>           | 0.40798                                                                                         | 0.2292  | -0.04736 |
| <b>C20</b>           | -0.05678                                                                                        | 0.7404  | 0.12621  |
| <b>C21</b>           | 0.43928                                                                                         | 0.27345 | 0.3197   |
| <b>C22</b>           | 0.40095                                                                                         | 0.29561 | 0.34503  |
| <b>C23</b>           | 0.36571                                                                                         | 0.28516 | 0.17291  |
| <b>C24</b>           | 0.32608                                                                                         | 0.31028 | 0.19291  |

|            |          |         |          |
|------------|----------|---------|----------|
| <b>C25</b> | -0.01504 | 0.71857 | 0.11602  |
| <b>N26</b> | -0.01097 | 0.68134 | 0.0103   |
| <b>O27</b> | 0.41326  | 0.80377 | -0.24331 |
| <b>O28</b> | 0.39738  | 0.67237 | 0.54695  |
| <b>C29</b> | 0.42408  | 0.63702 | 0.49501  |
| <b>C30</b> | 0.37604  | 0.82169 | -0.37143 |
| <b>C31</b> | 0.39548  | 0.5995  | 0.43614  |
| <b>C32</b> | 0.38939  | 0.86006 | -0.54161 |
| <b>N33</b> | 0.21108  | 0.46269 | -0.3281  |
| <b>C34</b> | 0.42186  | 0.56119 | 0.36111  |
| <b>C35</b> | 0.3504   | 0.8837  | -0.65283 |
| <b>H36</b> | 0.09016  | 0.53789 | 0.22972  |
| <b>H37</b> | 0.12705  | 0.65279 | 0.31027  |
| <b>H38</b> | 0.06085  | 0.69148 | 0.34784  |
| <b>H39</b> | 0.00541  | 0.61565 | -0.31892 |
| <b>H40</b> | 0.07276  | 0.57562 | -0.3459  |
| <b>H41</b> | 0.22178  | 0.57122 | 0.20878  |
| <b>H42</b> | 0.28619  | 0.61324 | 0.23136  |
| <b>H43</b> | 0.2241   | 0.70801 | -0.27279 |
| <b>H44</b> | 0.15891  | 0.66593 | -0.28497 |
| <b>H45</b> | 0.34216  | 0.24495 | -0.15699 |
| <b>H46</b> | 0.46596  | 0.28174 | 0.45703  |
| <b>H47</b> | 0.32219  | 0.33071 | 0.37489  |
| <b>H48</b> | 0.0123   | 0.73461 | 0.20536  |
| <b>H49</b> | 0.44387  | 0.63119 | 0.68849  |
| <b>H50</b> | 0.4462   | 0.64168 | 0.31025  |
| <b>H51</b> | 0.35295  | 0.83102 | -0.20246 |
| <b>H52</b> | 0.36068  | 0.79904 | -0.51856 |
| <b>H53</b> | 0.37375  | 0.60665 | 0.25419  |

|            |         |         |          |
|------------|---------|---------|----------|
| <b>H54</b> | 0.37555 | 0.59285 | 0.62807  |
| <b>H55</b> | 0.40974 | 0.85045 | -0.72509 |
| <b>H56</b> | 0.40856 | 0.88107 | -0.40282 |
| <b>H57</b> | 0.44183 | 0.56714 | 0.16858  |
| <b>H58</b> | 0.3997  | 0.53522 | 0.31315  |
| <b>H59</b> | 0.44283 | 0.55226 | 0.54313  |
| <b>H60</b> | 0.33202 | 0.89702 | -0.47093 |
| <b>H61</b> | 0.32908 | 0.86272 | -0.77666 |
| <b>H62</b> | 0.36109 | 0.90943 | -0.79401 |
| <b>S63</b> | 0.24329 | 0.5     | -0.46464 |

---



Table S5. Unit cell parameters and fractional atomic coordinates for HIAM-0025 based on the AA-stacking.

| Space group          | CM                                                                                              |         |          |
|----------------------|-------------------------------------------------------------------------------------------------|---------|----------|
| Calculated unit cell | a = 31.7806 Å, b = 32.2379 Å, c = 4.4875<br>$\alpha = \gamma = 90^\circ, \beta = 90.3228^\circ$ |         |          |
| <b>C1</b>            | 0.10593                                                                                         | 0.52149 | -0.28602 |
| <b>C2</b>            | 0.13731                                                                                         | 0.45598 | -0.12393 |
| <b>C3</b>            | 0.16872                                                                                         | 0.479   | 0.03247  |
| <b>N4</b>            | 0.13558                                                                                         | 0.5887  | -0.11417 |
| <b>C5</b>            | 0.09363                                                                                         | 0.60896 | -0.13148 |
| <b>C6</b>            | 0.1747                                                                                          | 0.61394 | -0.09642 |
| <b>C7</b>            | 0.0886                                                                                          | 0.64428 | -0.30763 |
| <b>C8</b>            | 0.04988                                                                                         | 0.66616 | -0.307   |
| <b>C9</b>            | 0.01497                                                                                         | 0.65341 | -0.12571 |
| <b>C10</b>           | 0.01855                                                                                         | 0.61671 | 0.03538  |
| <b>C11</b>           | 0.0576                                                                                          | 0.59471 | 0.03343  |
| <b>C12</b>           | 0.21395                                                                                         | 0.60139 | -0.22869 |
| <b>C13</b>           | 0.25128                                                                                         | 0.62549 | -0.21156 |
| <b>C14</b>           | 0.25029                                                                                         | 0.66336 | -0.06183 |
| <b>C15</b>           | 0.2111                                                                                          | 0.67708 | 0.05942  |
| <b>C16</b>           | 0.17389                                                                                         | 0.65276 | 0.04289  |
| <b>N17</b>           | 0.28788                                                                                         | 0.31079 | -0.04183 |
| <b>C18</b>           | 0.359                                                                                           | 0.25327 | -0.05905 |
| <b>C19</b>           | 0.39476                                                                                         | 0.22625 | -0.07308 |
| <b>C20</b>           | -0.06298                                                                                        | 0.74275 | -0.08274 |
| <b>C21</b>           | 0.44287                                                                                         | 0.28506 | -0.0568  |
| <b>C22</b>           | 0.40742                                                                                         | 0.3118  | -0.02024 |
| <b>C23</b>           | 0.36509                                                                                         | 0.2958  | -0.03592 |
| <b>C24</b>           | 0.32757                                                                                         | 0.32416 | -0.03578 |

|            |          |         |          |
|------------|----------|---------|----------|
| <b>C25</b> | -0.02333 | 0.71749 | -0.1146  |
| <b>N26</b> | -0.02359 | 0.67782 | -0.09541 |
| <b>O27</b> | 0.38983  | 0.81659 | -0.08409 |
| <b>O28</b> | 0.41247  | 0.64596 | 0.03805  |
| <b>C29</b> | 0.45529  | 0.63025 | 0.08125  |
| <b>C30</b> | 0.35046  | 0.83379 | 0.02954  |
| <b>C31</b> | 0.45269  | 0.58629 | 0.19714  |
| <b>C32</b> | 0.35666  | 0.87976 | 0.07096  |
| <b>N33</b> | 0.20148  | 0.46337 | 0.19358  |
| <b>C34</b> | 0.49611  | 0.5633  | 0.17742  |
| <b>C35</b> | 0.31549  | 0.89974 | 0.19725  |
| <b>C36</b> | 0.53465  | 0.5869  | 0.30801  |
| <b>C37</b> | 0.32211  | 0.94546 | 0.24673  |
| <b>H38</b> | 0.08074  | 0.53701 | -0.40972 |
| <b>H39</b> | 0.11546  | 0.65591 | -0.43566 |
| <b>H40</b> | 0.0476   | 0.69333 | -0.4457  |
| <b>H41</b> | -0.0083  | 0.60605 | 0.17233  |
| <b>H42</b> | 0.05992  | 0.56713 | 0.16555  |
| <b>H43</b> | 0.21614  | 0.57248 | -0.34015 |
| <b>H44</b> | 0.2806   | 0.61465 | -0.31981 |
| <b>H45</b> | 0.2094   | 0.70669 | 0.16834  |
| <b>H46</b> | 0.14422  | 0.6651  | 0.13212  |
| <b>H47</b> | 0.32629  | 0.24142 | -0.06828 |
| <b>H48</b> | 0.47565  | 0.29682 | -0.062   |
| <b>H49</b> | 0.33366  | 0.35675 | -0.03246 |
| <b>H50</b> | 0.00725  | 0.73347 | -0.14114 |
| <b>H51</b> | 0.47262  | 0.64864 | 0.25522  |
| <b>H52</b> | 0.47314  | 0.6312  | -0.13702 |
| <b>H53</b> | 0.34235  | 0.82004 | 0.25297  |

---

|            |         |         |          |
|------------|---------|---------|----------|
| <b>H54</b> | 0.32364 | 0.82827 | -0.13373 |
| <b>H55</b> | 0.42826 | 0.56919 | 0.06209  |
| <b>H56</b> | 0.44132 | 0.58662 | 0.43579  |
| <b>H57</b> | 0.36502 | 0.89374 | -0.15077 |
| <b>H58</b> | 0.38414 | 0.885   | 0.22959  |
| <b>H59</b> | 0.50301 | 0.55516 | -0.06156 |
| <b>H60</b> | 0.49267 | 0.53443 | 0.306    |
| <b>H61</b> | 0.3067  | 0.88535 | 0.41668  |
| <b>H62</b> | 0.28818 | 0.89519 | 0.03638  |
| <b>H63</b> | 0.54333 | 0.61296 | 0.15893  |
| <b>H64</b> | 0.56324 | 0.56633 | 0.32331  |
| <b>H65</b> | 0.52707 | 0.59856 | 0.53732  |
| <b>H66</b> | 0.29187 | 0.95908 | 0.33895  |
| <b>H67</b> | 0.32999 | 0.96069 | 0.02905  |
| <b>H68</b> | 0.34884 | 0.95088 | 0.41057  |
| <b>S69</b> | 0.23355 | 0.5     | 0.34373  |

---

Table S6. Summary of photocatalytic H<sub>2</sub>O<sub>2</sub> production using COFs as photocatalysts.

| Entry | COFs          | Condition                        | Light source               | H <sub>2</sub> O <sub>2</sub> (μmol/g/h) | Ref. |
|-------|---------------|----------------------------------|----------------------------|------------------------------------------|------|
| 1     | TpAQ-COF      | Water, O <sub>2</sub>            | 300 W Xe lamp (λ > 420 nm) | 420                                      | 1    |
| 2     | TD-COF        | Water, O <sub>2</sub>            | White LED (400-700nm)      | 4620                                     | 2    |
|       |               | Water, air                       |                            | 4060                                     |      |
|       |               | Seawater, air                    |                            | 3364                                     |      |
| 3     | FS-COF        | Water, O <sub>2</sub>            | 300 W Xe lamp (λ > 420 nm) | 3904                                     | 3    |
| 4     | Py-Da-COF     | Water, O <sub>2</sub>            | 300 W Xe lamp (λ > 420 nm) | 461                                      | 4    |
|       |               | Water/EtOH (9/1), O <sub>2</sub> |                            | 682                                      |      |
| 5     | PMCR-1        | Water, air                       | 300 W Xe lamp (420-700 nm) | 1294                                     | 5    |
|       |               | Water, O <sub>2</sub>            |                            | 1445                                     |      |
|       |               | Water/BA (10/1), O <sub>2</sub>  |                            | 5499                                     |      |
| 6     | TDB-COF       | Water, air                       | AM 1.5                     | 231                                      | 6    |
|       |               | Water, O <sub>2</sub>            |                            | 723.5                                    |      |
|       |               | Water/EtOH(9/1), O <sub>2</sub>  |                            | 1000.1                                   |      |
| 7     | COF-N32       | Water, O <sub>2</sub>            | 300 W Xe lamp (λ > 420 nm) | 605                                      | 7    |
| 8     | COF-2CN       | Water, O <sub>2</sub>            | 300 W Xe lamp (λ > 420 nm) | 1601                                     | 8    |
| 9     | COF-TfpBpy    | Water, air                       | 300 W Xe lamp (λ > 420 nm) | 2084                                     | 9    |
| 10    | TaptBtt       | Water, air                       | 300 W Xe lamp AM 1.5G      | 1407                                     | 10   |
| 11    | DETH-COF      | Water, air                       | 300 W Xe lamp (λ > 420 nm) | 1012                                     | 11   |
|       |               | Water, O <sub>2</sub>            |                            | 1665                                     |      |
| 12    | TTF-BT-COF    | Water, O <sub>2</sub>            | 300 W Xe lamp (λ > 420 nm) | 2760                                     | 12   |
| 13    | NiPc-THHI-COF | Water, O <sub>2</sub>            | 300 W Xe lamp (λ > 400 nm) | 4589                                     | 13   |
| 14    | Fs-OHOMe-COF  | Water, air                       | 300 W Xe lamp (λ > 400 nm) | 2200                                     | 14   |
| 15    | PTA@TTB-EB    | Water, O <sub>2</sub>            | 300 W Xe lamp (λ > 420 nm) | 897.94                                   | 15   |
| 16    | APF-N-C       | Water, O <sub>2</sub>            | 300 W Xe lamp              | 1574                                     | 16   |

|    |                            |                                  |                                     |               |    |
|----|----------------------------|----------------------------------|-------------------------------------|---------------|----|
|    |                            |                                  | (420-700 nm)                        |               |    |
| 17 | TTA-CTP-COF                | Water, O <sub>2</sub>            | Full spectrum                       | 520           | 17 |
| 18 | TAPT-PDA-COF               | Water/IPA (9/1), O <sub>2</sub>  | 300 W Xe lamp ( $\lambda > 420$ nm) | 706.2         | 18 |
| 19 | EBA-COF                    | Water/EtOH(9/1), O <sub>2</sub>  | 50 W LED lamp ( $\sim 420$ nm)      | 1830          | 19 |
| 20 | TAPB-PDA-OH                | Water, O <sub>2</sub>            | 10 W LED lamp ( $\lambda > 420$ nm) | 1841.3        | 20 |
|    |                            | Water/EtOH(9/1), O <sub>2</sub>  |                                     | 2177.6        |    |
| 21 | DMCR-1NH                   | Water/IPA (10/1), O <sub>2</sub> | 300 W Xe lamp (420-700 nm)          | 2588          | 21 |
|    |                            | Water/IPA (10/1), air            |                                     | 2264.5        |    |
| 22 | TF <sub>50</sub> -COF      | Water/EtOH (9/1), O <sub>2</sub> | 300 W Xe lamp ( $\lambda > 400$ nm) | 1739          | 22 |
| 23 | COF-NUST-16                | Water/EtOH(9/1), O <sub>2</sub>  | 300 W Xe lamp ( $\lambda > 420$ nm) | 1081          | 23 |
| 24 | TAPT-TFPA COFs@Pd ICs      | Water/EtOH(9/1), O <sub>2</sub>  | 300 W Xe lamp AM 1.5                | 2143          | 24 |
| 25 | TPB-DMTP-COF               | Water/EtOH/5wt.% PTFE, air       | 300 W Xe lamp ( $\lambda > 420$ nm) | 2882          | 25 |
| 26 | COF-TAPB-BPDA              | Water/BA (4/1), O <sub>2</sub>   | 300 W Xe lamp ( $\lambda > 420$ nm) | 1240          | 26 |
| 27 | COF-BTT-TAPT               | Water/EtOH(1/9), O <sub>2</sub>  | 300 W Xe lamp ( $\lambda > 420$ nm) | 620           | 27 |
| 28 | Bpy-TAPT                   | Water, O <sub>2</sub>            | 300 W Xe lamp ( $\lambda > 420$ nm) | 4038          | 28 |
| 29 | TAPT-BT-COF                | Water, O <sub>2</sub>            | 300 W Xe lamp ( $\lambda > 420$ nm) | 1360 $\pm$ 30 | 29 |
| 30 | DQTb-COFs                  | Water, O <sub>2</sub>            | 300 W Xe lamp ( $\lambda > 400$ nm) | 1844          | 30 |
| 31 | HEP-TAPT-COF               | Water, O <sub>2</sub>            | 300 W Xe lamp ( $\lambda > 420$ nm) | 1750          | 31 |
| 32 | TPDz                       | Water, O <sub>2</sub>            | 300 W Xe lamp ( $\lambda > 420$ nm) | 7327          | 32 |
| 33 | TAPD-(Me) <sub>2</sub> COF | Water/EtOH(9/1), O <sub>2</sub>  | 300 W Xe lamp (420-700 nm)          | 97            | 33 |
|    |                            | Water/EtOH(1/9), O <sub>2</sub>  |                                     | 234.5         |    |
| 34 | TP-DPBD <sub>30</sub> -    | Water, air                       | 300 W Xe lamp ( $\lambda > 300$ nm) | 9200          | 34 |

|    |                                    |                                    |                                           |              |           |
|----|------------------------------------|------------------------------------|-------------------------------------------|--------------|-----------|
|    |                                    |                                    | 300 W Xe lamp<br>(420-600 nm)             | 7200<br>8100 |           |
|    |                                    | Water, O <sub>2</sub>              |                                           |              |           |
| 35 | COF@H <sub>3</sub> PO <sub>4</sub> | Water, O <sub>2</sub>              | 300 W Xe lamp<br>( $\lambda > 420$ nm)    | 5214         | 35        |
| 36 | H <sub>2</sub> Se-COF              | Water/BA(9/1), O <sub>2</sub>      | 300 W Xe lamp<br>( $\lambda > 420$ nm)    | 6145         | 36        |
| 37 | HCOF                               | Water, O <sub>2</sub>              | 300 W Xe lamp<br>( $\lambda \geq 420$ nm) | 2113.9       | 37        |
| 38 | TTF-PDI-COF                        | Water/BA(9/1), O <sub>2</sub>      | LED lamp<br>( $\sim 420$ nm)              | 3600         | 38        |
| 39 | TPB-COF-OH                         | Water, air                         | 300 W Xe lamp<br>( $\lambda \geq 420$ nm) | 6608         | 39        |
| 40 | TBD-COF                            | Water, O <sub>2</sub>              | white LED<br>(400-700 nm)                 | 6085         | 40        |
|    |                                    | Water, air                         |                                           | 5448         |           |
| 41 | PyIm-COF                           | Water, O <sub>2</sub>              | 300 W Xe lamp<br>( $\lambda > 420$ nm)    | 5850         | 41        |
| 42 | DVA-COF                            | Water/BA(9/1), O <sub>2</sub>      | LED lamp<br>( $\sim 420$ nm)              | 8450         | 42        |
| 43 | Kf-AQ                              | Water, O <sub>2</sub><br>(pH = 13) | 300 W Xe lamp<br>( $\lambda > 400$ nm)    | 4784         | 43        |
| 44 | TBTN-COF                           | Water, O <sub>2</sub>              | 300 W Xe lamp<br>( $\lambda > 420$ nm)    | 11013        | 44        |
| 45 | TB-COF                             | Water, air                         | white LED<br>(400-700 nm)                 | 5186         | 45        |
| 46 | p-COF-TpPzda                       | Water, O <sub>2</sub>              | 300 W Xe lamp<br>( $\lambda > 420$ nm)    | 6434         | 46        |
| 47 | 20COFIS                            | Water, air                         | 360 W Xe lamp                             | 5713.15      | 47        |
| 48 | Hz-TP-BT-COF                       | Water, air                         | 300 W Xe lamp<br>(420-600 nm)             | 5700         | 48        |
|    |                                    | Water, O <sub>2</sub>              |                                           | 6500         |           |
|    |                                    | Water, air                         | 300 W Xe lamp<br>( $\lambda > 300$ nm)    | 12500        |           |
| 49 | SO <sub>3</sub> H-COF              | Water, O <sub>2</sub>              | 300 W Xe lamp<br>( $\lambda > 400$ nm)    | 3015         | 49        |
|    |                                    | Water/MeOH(9/1),<br>O <sub>2</sub> |                                           | 4971         |           |
| 50 | HIAM-0022                          | Water, air                         | 300 W Xe lamp<br>( $\lambda > 420$ nm)    | 68.89        | This work |
|    | HIAM-0023                          |                                    |                                           | 149.51       |           |
|    | HIAM-0024                          |                                    |                                           | 86.09        |           |
|    | HIAM-0025                          |                                    |                                           | 70.06        |           |
|    | HIAM-0023-<br>12.5%                |                                    |                                           | 264.02       |           |
|    | HIAM-0023-25%                      |                                    |                                           | 307.33       |           |

|  |                     |  |  |        |  |
|--|---------------------|--|--|--------|--|
|  | HIAM-0023-<br>37.5% |  |  | 391.66 |  |
|  | HIAM-0023-50%       |  |  | 246    |  |

## References

1. Zhang, X.; Zhang, J.; Miao, J.; Wen, X.; Chen, C.; Zhou, B.; Long, M. *Chem. Eng. J.* **2023**, 466, 143085.
2. Yue, J. Y.; Song, L. P.; Fan, Y. F.; Pan, Z. X.; Yang, P.; Ma, Y.; Xu, Q.; *Angew. Chem. Int. Ed.* **2023**, 62, e202309624.
3. Luo, Y.; Zhang, B.; Liu, C.; Xia, D.; Ou, X.; Cai, Y.; Zhou, Y.; Jiang, J.; Han, B. *Angew. Chem. Int. Ed.* **2023**, 62, e202305355.
4. Sun, J.; Sekhar Jena, H.; Krishnaraj, C.; Singh Rawat, K.; Abednatanzi, S.; Chakraborty, J.; Laemont, A.; Liu, W.; Chen, H.; Liu, Y. Y.; *Angew. Chem. Int. Ed.* **2023**, 62, e202216719.
5. Das, P.; Roeser, J.; Thomas, A. *Angew. Chem. Int. Ed.* **2023**, 62, e202304349.
6. Zhou, Z.; Sun, M.; Zhu, Y.; Li, P.; Zhang, Y.; Wang, M.; Shen, Y. *Appl. Catal. B. Environ.* **2023**, 334, 122862.
7. Liu, F.; Zhou, P.; Hou, Y.; Tan, H.; Liang, Y.; Liang, J.; Zhang, Q.; Guo, S.; Tong, M.; Ni, *Nat. Commun.* **2023**, 14, 4344.
8. Hou, Y.; Zhou, P.; Liu, F.; Lu, Y.; Tan, H.; Li, Z.; Tong, M.; Ni, J. *Angew. Chem. Int. Ed.* **2023**, 63, e202318562.
9. Kou, M.; Wang, Y.; Xu, Y.; Ye, L.; Huang, Y.; Jia, B.; Li, H.; Ren, J.; Deng, Y.; Chen, J.; *Angew. Chem. Int. Ed.* **2022**, 61, e202200413.
10. Qin, C.; Wu, X.; Tang, L.; Chen, X.; Li, M.; Mou, Y.; Su, B.; Wang, S.; Feng, C.; Liu, J.; *Nat. Commun.* **2023**, 14, 5238.

11. Pan, G.; Hou, X.; Liu, Z.; Yang, C.; Long, J.; Huang, G.; Bi, J.; Yu, Y.; Li, L. *ACS. Catal.* **2022**, 12, 14911-14917.
12. Chang, J. N.; Li, Q.; Shi, J. W.; Zhang, M.; Zhang, L.; Li, S.; Chen, Y.; Li, S. L.; Lan, Y. Q. *Angew. Chem. Int. Ed.* **2023**, 63, e202218868.
13. Wang, X.; Jin, Y.; Li, N.; Zhang, H.; Liu, X.; Yang, X.; Pan, H.; Wang, T.; Wang, K.; Qi, D.; *Angew. Chem. Int. Ed.* **2024**, 63, e202401014.
14. Shu, C.; Yang, X.; Liu, L.; Hu, X.; Sun, R.; Yang, X.; Cooper, A.; Tan, B.; Wang, X. *Angew. Chem. Int. Ed.* **2024**, 63, e202403926.
15. Rong, Q.; Chen, X.; Li, S.; He, S. *ACS. Appl. Mater. Interfaces.* **2024**, 16, 5758-5768
16. Deng, M.; Sun, J.; Laemont, A.; Liu, C.; Wang, L.; Bourda, L.; Chakraborty, J.; Van Hecke, K.; Morent, R.; De Geyter, N. *Green. Chem.* **2023**, 25, 3069-3076.
17. Liao, J.-P.; Zhang, M.; Huang, P.; Dong, L.-Z.; Ma, T.-T.; Huang, G.-Z.; Liu, Y.-F.; Lu, M.; Li, S.-L.; Lan, Y.-Q. *ACS. Catal.* **2024**, 3778-3787.
18. Zhou, S.; Hu, H.; Hu, H.; Jiang, Q.; Xie, H.; Li, C.; Gao, S.; Kong, Y.; Hu, Y. *Sci. China Mater.* **2023**, 66, 1837-1846.
19. Zhai, L.; Xie, Z.; Cui, C.-X.; Yang, X.; Xu, Q.; Ke, X.; Liu, M.; Qu, L.-B.; Chen, X.; Mi, L. *Chem. Mater.* **2022**, 34, 5232-5240.
20. Yang, Y.; Kang, J.; Li, Y.; Liang, J.; Liang, J.; Jiang, L.; Chen, D.; He, J.; Chen, Y.; Wang, J. *New J. Chem.* **2022**, 46, 21605-21614.
21. Das, P.; Chakraborty, G.; Roeser, J.; Vogl, S.; Rabeah, J.; Thomas, A. *J. Am. Chem. Soc.* **2023**, 145, 2975-2984.



22. Wang, H.; Yang, C.; Chen, F.; Zheng, G.; Han, Q. *Angew. Chem. Int. Ed.* **2022**, 61, e202202328.
23. Wu, M.; Shan, Z.; Wang, J.; Liu, T.; Zhang, G. *Chem. Eng. J.* **2023**, 454, 140121.
24. Liu, Y.; Li, L.; Tan, H.; Ye, N.; Gu, Y.; Zhao, S.; Zhang, S.; Luo, M.; Guo, S. *J. Am. Chem. Soc.* **2023**, 145, 19877-19884.
25. Li, L.; Xu, L.; Hu, Z.; Yu, J. C. *Adv. Funct. Mater.* **2021**, 31, 2106120.
26. Yang, T.; Chen, Y.; Wang, Y.; Peng, X.; Kong, A. *ACS. Appl. Mater. Interfaces.* **2023**, 15, 8066-8075.
27. Liu, M.; He, P.; Gong, H.; Zhao, Z.; Li, Y.; Zhou, K.; Lin, Y.; Li, J.; Bao, Z.; Yang, Q.; *Chem. Eng. J.* **2024**, 482, 148922.
28. Liu, Y.; Han, W.-K.; Chi, W.; Mao, Y.; Jiang, Y.; Yan, X.; Gu, Z.-G. *Appl. Catal. B.* **2023**, 331, 122691.
29. Wang, L.; Sun, J.; Deng, M.; Liu, C.; Ataberk Cayan, S.; Molken, K.; Geiregat, P.; Morent, R.; De Geyter, N.; Chakraborty, J.; *Catal. Sci Technol.* **2023**, 13, 6463-6471.
30. Luo, Y.; Liu, C.; Liu, J.; Liu, X.; Zhou, Y.; Ou, X.; Weng, B.; Jiang, J.; Han, B. *Chem. Eng. J.* **2024**, 481, 148494.
31. Chen D, ; Chen W, ; Chen L; *Angew. Chem. Int. Ed.* **2023**, 62, e202217479.
32. Liao, Q.; Sun, Q.; Xu, H.; Wang, Y.; Xu, Y.; Li, Z.; Hu, J.; Wang, D.; Li, H.; Xi, K. *Angew. Chem. Int. Ed.* **2023**, 62, e202310556.
33. Krishnaraj, C.; Sekhar Jena, H.; Bourda, L.; Laemont, A.; Pachfule, P.; Roeser, J.; Chandran, C. V.; Borgmans, S.; Rogge, S. M. J.; Leus, K.; *J. Am. Chem. Soc.* **2020**, 142, 20107-20116.

34. Chen, Y.; Liu, R.; Guo, Y.; Wu, G.; Sum, T. C.; Yang, S. W.; Jiang, D. *Nat. Synth.* **2024**, 1-13.
35. Lin, Y.; Zou, J.; Wu, X.; Tong, S.; Niu, Q.; He, S.; Luo, S.; Yang, C. *Nano. Letters.* **2024**, 24, 6302-6311.
36. Dong, P.; Xu, X.; Wu, T.; Luo, R.; Kong, W.; Xu, Z.; Yuan, S.; Zhou, J.; Lei, J. *Angew. Chem. Int. Ed.* **2024**, 63, e202405313.
37. Zhu, Q.; Shi, L.; Li, Z.; Li, G.; Xu, X. *Angew. Chem. Int. Ed.* **2024**, 63, e202408041.
38. Xu, H.; Xia, S.; Li, C.; Li, Y.; Xing, W.; Jiang, Y.; Chen, X. *Angew. Chem. Int. Ed.* **2024**, 63, e202405476.
39. Feng, S.; Cheng, H.; Chen, F.; Liu, X.; Wang, Z.; Xu, H.; Hua, J. *ACS. Catalysis.* **2024**, 14, 7736-7745.
40. Yue, J. Y.; Luo, J. X.; Pan, Z. X.; Zhang, R. Z.; Yang, P.; Xu, Q.; Tang, B. *Angew. Chem. Int. Ed.* **2024**, 63, e202405763.
41. Wu, W.; Li, Z.; Liu, S.; Zhang, D.; Cai, B.; Liang, Y.; Wu, M.; Liao, Y.; Zhao, X. *Angew. Chem. Int. Ed.* **2024**, 63, e202404563.
42. Yu, H.; Zhang, F.; Chen, Q.; Zhou, P. K.; Xing, W.; Wang, S.; Zhang, G.; Jiang, Y.; Chen, X. *Angew. Chem. Int. Ed.* **2024**, 63, e202402297.
43. Zhang, X.; Cheng, S.; Chen, C.; Wen, X.; Miao, J.; Zhou, B.; Long, M.; Zhang, L. *Nat. Commun.* **2024**, 15, 2649.
44. Zhou, E.; Wang, F.; Zhang, X.; Hui, Y.; Wang, Y. *Angew. Chem. Int. Ed.* **2024**, 63, e202400999.

45. Yue, J.-Y.; Song, L.-P.; Pan, Z.-X.; Yang, P.; Ma, Y.; Xu, Q.; Tang, B. *ACS. Catalysis*. **2024**, 14, 4728-4737.
46. Yang, T.; Zhang, D.; Kong, A.; Zou, Y.; Yuan, L.; Liu, C.; Luo, S.; Wei, G.; Yu, C. *Angew. Chem. Int. Ed.* **2024**, 63, e202404077.
47. Qiu, J.; Meng, K.; Zhang, Y.; Cheng, B.; Zhang, J.; Wang, L.; Yu, J. *Adv. Mater.* **2024**, 2400288.
48. Liu, R.; Chen, Y.; Yu, H.; Položij, M.; Guo, Y.; Sum, T. C.; Heine, T.; Jiang, D. *Nat. Catal.* **2024**, 7, 195-206.
49. Li, L.; Lv, X.; Xue, Y.; Shao, H.; Zheng, G.; Han, Q. *Angew. Chem. Int. Ed.* **2024**, 63, e202320218.
